# Supplementary material
Source: publisher figshare collection journal article supplement (https://gsapubs.figshare.com/ndownloader/files/25999313)
Supplement: Supplementary file 1 [file 25999313]

## Sheet: Table S4_U-Th-Pb isotopic
Supplemental Material for Ocampo-Díaz, Y.Z.E., Torres-Sánchez, S.A., Augustsson, C., Macías, J.L., Sosa-Ceballos, G., Cisneros-Máximo, G., García-Sánchez, L.,
Osorio-Ocampo, S., Avellan, D.R., Omma, J., Ortega-Obregón, C., Solari, L.A., and González-Barba, G., 2020, Provenance of the El Salto Formation (early Oligocene
to early Miocene), southern part of La Reforma caldera, Baja California Sur, Mexico, in Martens, U.C., and Molina Garza, R.S., eds., Southern and Central Mexico:
Basement Framework, Tectonic Evolution, and Provenance of Mesozoic–Cenozoic Basins: GSA Special Paper 546, p. 1–32, https://doi. org/10.1130/2020.2546(11).
	Table S4: U-TH-PB ISOTOPIC COMPOSITION OF DETRITAL ZIRCON ANALYZED AT THE CENTRO DE GEOCIENCIAS, UNIVERSIDAD NACIONAL AUTÓNOMA DE MÉXICO
					CORRECTED RATIOS										CORRECTED AGES (Ma)
	Spot Name	U (ppm)	Th (ppm)	Th/U	207Pb/206Pb	±2σ abs	207Pb/235U	±2σ abs	206Pb/238U	±2σ abs	208Pb/232Th	±2σ abs	Rho		206Pb/238U	±2σ	207Pb/235U	±2σ	207Pb/206Pb	±2σ	Best age (Ma)	±2σ		U/Th
	Sample: SO-26 Creataceous granite, 27°24´55.50"N and 112°24´07.97"O
	Zircon-01	195	67.6	0.346667	0.0427	0.0061	0.09	0.013	0.01508	0.00061	0.00362	0.00061	0.029776		96.5	3.9	87	12	-60	270	96.5	3.9		2.88462
	Zircon-02	139	75	0.539568	0.046	0.0071	0.104	0.015	0.01635	0.00067	0.00473	0.0006	0.093497		104.6	4.2	99	14	-70	290	104.6	4.2		1.85333
	Zircon-03	263	126	0.479087	0.0474	0.0059	0.099	0.011	0.01499	0.00057	0.00493	0.00045	0.12547		95.9	3.6	95	11	80	240	95.9	3.6		2.0873
	Zircon-04	343	140	0.408163	0.0487	0.0042	0.0979	0.0091	0.01449	0.00039	0.00462	0.00035	0.065835		92.7	2.5	94.4	8.4	150	180	92.7	2.5		2.45
	Zircon-05	214	74.5	0.348131	0.0481	0.0069	0.104	0.015	0.01561	0.0006	0.00499	0.00069	0.15714		99.9	3.8	102	13	170	270	99.9	3.8		2.87248
	Zircon-06	197	79	0.401015	0.0468	0.007	0.103	0.015	0.01494	0.00058	0.00497	0.00053	0.15239		95.6	3.7	99	13	80	280	95.6	3.7		2.49367
	Zircon-07	580	265	0.456897	0.0474	0.0046	0.0954	0.0094	0.01465	0.00047	0.00505	0.00039	0.1921		93.7	3	92.3	8.8	50	190	93.7	3		2.18868
	Zircon-08	305	117	0.383607	0.0469	0.0063	0.096	0.012	0.01453	0.00047	0.00451	0.00042	-0.1778		93	3	94	12	40	260	93	3		2.60684
	Zircon-09	1420	2040	1.43662	0.0476	0.0027	0.0967	0.0049	0.01463	0.00031	0.00457	0.00019	-0.22421		93.6	2	93.7	4.6	71	120	93.6	2		0.696078
	Zircon-10	369	186	0.504065	0.0497	0.0046	0.0967	0.0083	0.01415	0.00045	0.00465	0.00035	-0.050239		90.6	2.8	93.4	7.7	130	190	90.6	2.8		1.98387
	Zircon-11	248	104.5	0.421371	0.0521	0.0044	0.1038	0.0085	0.01473	0.00061	0.00474	0.00045	0.020147		94.2	3.9	102.9	7.8	230	180	94.2	3.9		2.37321
	Zircon-12	265	105	0.396226	0.0453	0.0047	0.0923	0.0091	0.01472	0.00059	0.00465	0.00053	0.12549		94.2	3.8	89.2	8.5	-30	210	94.2	3.8		2.52381
	Zircon-13	208	90	0.432692	0.0446	0.0056	0.09	0.011	0.01533	0.00063	0.00476	0.0006	0.17258		98	4	90	10	-60	230	98	4		2.31111
	Zircon-14	154	80.7	0.524026	0.0452	0.0068	0.091	0.013	0.01516	0.00075	0.00478	0.00046	-0.25719		97	4.7	88	13	-70	300	97	4.7		1.9083
	Zircon-15	128	50.1	0.391406	0.0474	0.0083	0.094	0.017	0.0156	0.00069	0.00499	0.00065	0.28693		99.8	4.4	90	16	90	300	99.8	4.4		2.55489
	Zircon-16	96	35.7	0.371875	0.046	0.007	0.099	0.014	0.01461	0.00062	0.00516	0.00099	0.039286		93.5	3.9	94	13	60	280	93.5	3.9		2.68908
	Zircon-17	188	74.9	0.398404	0.0479	0.006	0.1	0.011	0.01464	0.00055	0.00431	0.00055	-0.044963		93.7	3.5	96	11	100	240	93.7	3.5		2.51001
	Zircon-18	301	144	0.478405	0.0486	0.0052	0.1007	0.0098	0.015	0.00052	0.00468	0.00036	-0.18815		95.9	3.3	97	9	100	220	95.9	3.3		2.09028
	Zircon-19	298	119	0.399329	0.0503	0.0052	0.103	0.0098	0.01459	0.00044	0.00471	0.00044	-0.048159		93.4	2.8	100.6	9.1	280	220	93.4	2.8		2.5042
	Zircon-20	421	180	0.427553	0.054	0.025	0.113	0.089	0.0152	0.00085	0.0057	0.0028	0.015763		97.2	5.4	108	54	290	190	97.2	5.4		2.33889
	Zircon-21	156	60.2	0.385897	0.0436	0.006	0.086	0.012	0.01457	0.00052	0.00505	0.00055	0.085109		93.3	3.3	83	11	-110	250	93.3	3.3		2.59136
	Zircon-22	209	81.8	0.391388	0.0548	0.0067	0.113	0.013	0.01498	0.00049	0.00478	0.00058	0.014842		95.8	3.1	108	12	340	250	95.8	3.1		2.55501
	Zircon-23	154	69.1	0.448701	0.0555	0.0082	0.113	0.015	0.0149	0.00063	0.00514	0.00053	-0.080499		95.3	4	110	13	310	270	95.3	4		2.22865
	Zircon-24	184	70	0.380435	0.0478	0.0073	0.093	0.013	0.0146	0.0007	0.00435	0.00055	-0.00036755		93.4	4.5	89	12	50	280	93.4	4.5		2.62857
	Zircon-25	163	66.7	0.409202	0.0445	0.0064	0.092	0.013	0.01525	0.0006	0.00491	0.00044	-0.062834		97.6	3.8	90	12	-90	260	97.6	3.8		2.44378
	Zircon-26	264	123	0.465909	0.0612	0.016	0.126	0.051	0.01493	0.00068	0.00559	0.0024	0.30638		95.5	4.3	120	37	590	290	95.5	4.3		2.14634
	Zircon-27	426	230	0.539906	0.048	0.0046	0.0983	0.0091	0.01495	0.00041	0.0047	0.00033	-0.046602		95.7	2.6	96.1	8.1	120	180	95.7	2.6		1.85217
	Zircon-28	314	188	0.598726	0.0444	0.0051	0.095	0.011	0.01495	0.00044	0.00455	0.00033	0.0059878		95.6	2.8	92	10	-60	230	95.6	2.8		1.67021
	Zircon-29	1432	2050	1.43156	0.0483	0.0027	0.0999	0.0052	0.01507	0.00033	0.004587	0.00018	0.1175		96.4	2.1	96.6	4.8	98	120	96.4	2.1		0.698537
	Zircon-30	174	65.8	0.378161	0.0532	0.0081	0.11	0.015	0.01488	0.00065	0.00503	0.00065	-0.28014		95.2	4.1	107	13	240	300	95.2	4.1		2.64438
	Zircon-31	327	158	0.48318	0.174	0.033	0.416	0.14	0.01764	0.0012	0.0156	0.0081	0.31003		112.7	7.8	353	71	2580	190	112.7	7.8		2.06962
	Zircon-32	158	55.2	0.349367	0.051	0.0065	0.105	0.012	0.01533	0.00056	0.00587	0.00086	0.0022095		98.1	3.6	101	11	200	240	98.1	3.6		2.86232
	Zircon-33	160	62	0.3875	0.0516	0.0069	0.103	0.014	0.01402	0.00048	0.00506	0.00069	0.18195		89.8	3.1	98	13	270	250	89.8	3.1		2.58065
	Zircon-34	265	121.4	0.458113	0.0467	0.0051	0.0935	0.0097	0.01477	0.00053	0.0048	0.00047	-0.036863		94.5	3.4	90.3	9	50	220	94.5	3.4		2.18287
	Zircon-35	200	124	0.62	0.051	0.0065	0.107	0.014	0.01527	0.00066	0.00522	0.0005	0.26422		97.7	4.2	102	13	200	260	97.7	4.2		1.6129
	Zircon-36	544	357	0.65625	0.0827	0.0084	0.185	0.02	0.01671	0.00042	0.0071	0.0011	0.37517		106.8	2.6	171	16	1190	160	106.8	2.6		1.52381
	Zircon-37	123	75	0.609756	0.0574	0.0089	0.08	0.012	0.01089	0.00051	0.00425	0.00063	0.02897		69.8	3.3	78	11	350	280	69.8	3.3		1.64
	Zircon-38	359	233	0.649025	0.0538	0.0075	0.0256	0.0033	0.00357	0.00016	0.00125	0.00016	-0.073911		23	1	26.3	3.2	320	260	23	1		1.54077
	Zircon-39	222	168	0.756757	0.062	0.011	0.0297	0.0063	0.00346	0.00017	0.00128	0.00025	0.11374		22.2	1.1	29.5	6.2	580	340	22.2	1.1		1.32143
	Zircon-40	435	313	0.71954	0.0578	0.0086	0.0287	0.0039	0.00353	0.00013	0.00122	0.00016	0.25319		22.71	0.86	28.7	3.8	470	250	22.71	0.86		1.38978
	Zircon-41	349	234	0.670487	0.143	0.012	0.0879	0.0078	0.00433	0.00017	0.00294	0.00032	0.34037		27.9	1.1	85.3	7.3	2280	160	27.9	1.1		1.49145
	Zircon-42	327	217	0.663609	0.0529	0.007	0.0275	0.0034	0.00384	0.00017	0.00134	0.00017	0.094084		24.7	1.1	27.4	3.4	190	260	24.7	1.1		1.50691
	Zircon-43	262	151	0.576336	0.0483	0.0043	0.156	0.012	0.02314	0.00061	0.0074	0.00073	0.06091		147.5	3.8	147	11	110	170	147.5	3.8		1.7351
	Zircon-44	329	244	0.741641	0.057	0.01	0.027	0.0045	0.00372	0.00018	0.00139	0.00019	-0.0030453		23.9	1.1	27	4.4	280	280	23.9	1.1		1.34836
	Zircon-45	217	106	0.488479	0.077	0.011	0.0414	0.0056	0.00389	0.00017	0.00199	0.00027	0.096039		25	1.1	41	5.5	1100	240	25	1.1		2.04717
	Zircon-46	428	210	0.490654	0.0508	0.0035	0.0908	0.0053	0.01308	0.00035	0.00459	0.0004	0.28991		83.8	2.2	88.2	4.9	200	150	83.8	2.2		2.0381
	Zircon-47	946	1078	1.13953	0.0567	0.0044	0.087	0.0063	0.01104	0.00026	0.00344	0.00035	0.16695		70.8	1.7	84.6	5.9	480	160	70.8	1.7		0.877551
	Zircon-48	655	429	0.654962	0.0571	0.0095	0.0307	0.0045	0.00377	0.00015	0.00139	0.00018	0.24534		24.23	0.94	30.7	4.4	440	260	24.23	0.94		1.52681
	Zircon-49	425	176	0.414118	0.0487	0.0035	0.1141	0.0074	0.01682	0.0004	0.00492	0.0005	0.10116		107.5	2.5	109.5	6.8	140	160	107.5	2.5		2.41477
	Zircon-50	750	628	0.837333	0.0506	0.004	0.0886	0.0064	0.01271	0.00029	0.00412	0.00038	-0.29182		81.4	1.8	86.2	6	200	160	81.4	1.8		1.19427
	Zircon-51	460	364	0.791304	0.0533	0.0085	0.0256	0.0042	0.00348	0.00013	0.00109	0.00015	0.29449		22.42	0.82	25.6	4.2	410	280	22.42	0.82		1.26374
	Zircon-52	310	163	0.525806	0.0484	0.005	0.0801	0.0072	0.01199	0.00036	0.00413	0.00042	-0.11138		76.8	2.3	78	6.8	70	200	76.8	2.3		1.90184
	Zircon-53	148	96	0.648649	0.0725	0.0057	0.173	0.013	0.01748	0.00057	0.00777	0.0008	0.43033		111.7	3.6	162	11	1030	170	111.7	3.6		1.54167
	Zircon-54	386	260	0.673575	0.0517	0.005	0.0838	0.0075	0.01179	0.00038	0.0041	0.00042	0.01403		75.5	2.4	81.6	6.9	290	180	75.5	2.4		1.48462
	Zircon-55	228	120	0.526316	0.071	0.012	0.0375	0.0057	0.00396	0.0002	0.00142	0.00026	-0.068715		25.5	1.3	37.2	5.5	840	260	25.5	1.3		1.9
	Zircon-56	2595	878	0.338343	0.0476	0.0028	0.0566	0.0028	0.00872	0.00019	0.00438	0.00039	0.056226		55.9	1.2	55.9	2.7	80	130	55.9	1.2		2.95558
	Zircon-57	204	82	0.401961	0.0554	0.0057	0.12	0.012	0.01582	0.00042	0.00505	0.00059	0.1204		101.2	2.7	114	11	390	210	101.2	2.7		2.4878
	Zircon-58	195	97	0.497436	0.05	0.0043	0.101	0.0072	0.01487	0.00044	0.0045	0.00048	-0.090133		95.1	2.8	97.5	6.6	150	180	95.1	2.8		2.01031
	Zircon-59	426	233	0.546948	0.0474	0.0065	0.0243	0.0031	0.00368	0.00014	0.00131	0.00016	0.12043		23.68	0.91	24.4	3.1	60	260	23.68	0.91		1.82833
	Zircon-60	343	64	0.186589	0.0479	0.0035	0.0987	0.0063	0.01494	0.00042	0.00495	0.00063	0.03605		95.6	2.7	95.5	5.8	80	160	95.6	2.7		5.35938
	Zircon-61	242	164	0.677686	0.091	0.013	0.0506	0.0067	0.00411	0.00018	0.00195	0.00025	0.23989		26.4	1.2	49.9	6.5	1340	290	26.4	1.2		1.47561
	Zircon-62	404	233	0.576733	0.0538	0.0044	0.1049	0.0079	0.01442	0.00034	0.0049	0.0005	0.30008		92.3	2.2	101.1	7.2	330	170	92.3	2.2		1.73391
	Zircon-63	274	145	0.529197	0.0473	0.004	0.0987	0.0076	0.01513	0.00043	0.00448	0.00044	0.083533		96.8	2.7	95.3	7	70	170	96.8	2.7		1.88966
	Zircon-64	288	138	0.479167	0.0573	0.0073	0.0279	0.0037	0.00363	0.00018	0.00139	0.0002	-0.041555		23.3	1.2	27.9	3.6	340	260	23.3	1.2		2.08696
	Zircon-65	139	46	0.330935	0.0522	0.0062	0.115	0.013	0.01504	0.00068	0.00565	0.0007	-0.047971		96.2	4.3	110	12	290	240	96.2	4.3		3.02174
	Zircon-66	437	344	0.787185	0.0478	0.0033	0.0954	0.0056	0.0144	0.0004	0.00452	0.00042	0.031756		92.2	2.6	92.5	5.2	100	150	92.2	2.6		1.27035
	Zircon-67	502	241	0.48008	0.0488	0.0038	0.085	0.0059	0.01271	0.00031	0.00428	0.00043	0.11798		81.4	2	82.7	5.5	120	160	81.4	2		2.08299
	Zircon-68	289	129	0.446367	0.05	0.0057	0.0956	0.0095	0.01378	0.0004	0.00462	0.00047	-0.43683		88.2	2.5	92.3	8.7	150	230	88.2	2.5		2.24031
	Zircon-69	247	206	0.834008	0.0597	0.0052	0.092	0.0068	0.01105	0.00032	0.0039	0.00042	0.0294		71.1	2	90.4	6.3	550	180	71.1	2		1.19903
	Zircon-70	830	563	0.678313	0.0476	0.0032	0.0768	0.0044	0.01151	0.00027	0.0035	0.00035	0.43406		73.8	1.7	75.1	4.2	70	150	73.8	1.7		1.47425
	Sample: Yaq-01-17: medium to coarse-grained sandstone, 27°24´57.01"N and 112°24´08.65"O
	Zircon-01	222	104	0.468468	0.0487	0.0048	0.0959	0.0086	0.0149	0.00048	0.00481	0.00035	0.0037254		95.3	3	94.8	8.4	140	200	95.3	3		2.13462
	Zircon-02	187	72	0.385027	0.0465	0.0049	0.093	0.0096	0.01468	0.00047	0.00504	0.00042	0.084737		94	3	89.4	9	20	210	94	3		2.59722
	Zircon-03	317	181	0.570978	0.0447	0.0043	0.0624	0.0058	0.01008	0.00032	0.00324	0.00023	0.14735		64.7	2	61.4	5.5	-80	190	64.7	2		1.75138
	Zircon-04	318	227	0.713836	0.106	0.0087	0.125	0.0095	0.00853	0.00026	0.00375	0.00026	0.29658		54.7	1.6	119	8.5	1750	140	54.7	1.6		1.40088
	Zircon-05	158	95.6	0.605063	0.0507	0.004	0.1044	0.0074	0.01504	0.00041	0.00467	0.00028	-0.19254		96.2	2.6	100.6	6.8	230	170	96.2	2.6		1.65272
	Zircon-06	63	79.9	1.26825	0.05	0.014	0.035	0.0098	0.00483	0.0003	0.00189	0.00017	0.28806		31	1.9	34	9.5	30	420	31	1.9		0.788486
	Zircon-07	174	140.7	0.808621	0.0476	0.0027	0.1008	0.0053	0.01554	0.00038	0.00482	0.00027	-0.024146		99.4	2.4	97.4	5.1	70	120	99.4	2.4		1.23667
	Zircon-08	82.5	120.3	1.45818	0.0493	0.0041	0.15	0.011	0.02235	0.00061	0.00708	0.00037	-0.067485		142.5	3.8	142.4	9.9	160	170	142.5	3.8		0.685786
	Zircon-09	167	422	2.52695	0.0512	0.0033	0.1474	0.0099	0.02126	0.00053	0.00649	0.00035	0.14861		135.6	3.4	139.4	8.7	250	140	135.6	3.4		0.395735
	Zircon-10	420	440	1.04762	0.0552	0.0054	0.0311	0.0033	0.00434	0.00015	0.001371	0.00011	-0.10227		27.89	0.95	31.1	3.2	410	200	27.89	0.95		0.954545
	Zircon-11	362	366	1.01105	0.0486	0.0046	0.0326	0.0029	0.0049	0.00016	0.001592	9.8e-05	-0.14878		31.52	1	32.5	2.8	110	180	31.52	1		0.989071
	Zircon-12	176	69	0.392045	0.0617	0.0089	0.0426	0.006	0.00509	0.00026	0.00226	0.00029	0.41775		32.7	1.6	42.2	5.8	570	250	32.7	1.6		2.55072
	Zircon-13	98	75	0.765306	0.0471	0.0057	0.099	0.011	0.01572	0.0007	0.00573	0.00045	0.02618		100.5	4.5	96.9	11	20	220	100.5	4.5		1.30667
	Zircon-14	139	79	0.568345	0.0497	0.0052	0.102	0.011	0.0151	0.00045	0.00508	0.00035	0.12624		96.6	2.9	98	9.7	140	210	96.6	2.9		1.75949
	Zircon-15	230	104	0.452174	0.0465	0.0038	0.0749	0.0063	0.01198	0.0004	0.00398	0.00029	0.19953		76.7	2.6	73.2	5.9	0	170	76.7	2.6		2.21154
	Zircon-16	171	110	0.643275	0.0501	0.0046	0.1028	0.0085	0.0153	0.00047	0.00517	0.00036	-0.20187		97.9	3	99	7.9	170	190	97.9	3		1.55455
	Zircon-17	74.3	49.2	0.66218	0.0457	0.0066	0.094	0.015	0.01548	0.00068	0.00513	0.00044	0.44468		99	4.3	92	13	-60	270	99	4.3		1.51016
	Zircon-18	83.6	33.5	0.400718	0.0546	0.0082	0.107	0.016	0.01445	0.0006	0.00568	0.00057	0.0013824		92.5	3.8	102	14	330	280	92.5	3.8		2.49552
	Zircon-19	344	155	0.450581	0.0525	0.011	0.1069	0.027	0.01536	0.00053	0.00515	0.00087	-0.13015		98.3	3.4	102.9	22	260	260	98.3	3.4		2.21935
	Zircon-20	371	121	0.326146	0.0603	0.0044	0.1283	0.009	0.01563	0.00041	0.0063	0.00041	0.045557		100	2.6	122.2	8.1	570	160	100	2.6		3.06612
	Zircon-21	408	201	0.492647	0.1243	0.013	0.274	0.034	0.01622	0.00051	0.01226	0.00074	0.1749		103.7	3.2	245.7	27	2030	150	103.7	3.2		2.02985
	Zircon-22	386	186	0.481865	0.0486	0.0058	0.0372	0.0039	0.0055	0.00019	0.00165	0.00015	-0.32693		35.4	1.2	37	3.8	170	230	35.4	1.2		2.07527
	Zircon-23	184	155	0.842391	0.074	0.0092	0.052	0.007	0.00542	0.00022	0.00216	0.00017	-0.055094		34.8	1.4	51.2	6.6	950	270	34.8	1.4		1.1871
	Zircon-24	194	187	0.963918	0.0531	0.011	0.0797	0.021	0.01175	0.00052	0.00374	0.00048	-0.084136		75.3	3.3	77.6	18	220	300	75.3	3.3		1.03743
	Zircon-25	132	75	0.568182	0.0514	0.006	0.0776	0.0099	0.01096	0.00053	0.00399	0.00038	0.30404		70.3	3.4	75.5	9.2	210	230	70.3	3.4		1.76
	Zircon-26	318	178.7	0.56195	0.0504	0.0033	0.0871	0.0054	0.01297	0.00037	0.0041	0.00027	0.25202		83	2.3	85.4	5.3	190	140	83	2.3		1.77952
	Zircon-27	125.3	58.5	0.466879	0.0508	0.0054	0.0953	0.009	0.01477	0.00054	0.00558	0.00047	-0.036983		94.5	3.4	92	8.4	150	210	94.5	3.4		2.14188
	Zircon-28	612	247	0.403595	0.0488	0.0031	0.0975	0.0063	0.0147	0.00034	0.00475	0.00027	0.21357		94.1	2.1	95	5.9	150	130	94.1	2.1		2.47773
	Zircon-29	247	97	0.392713	0.0469	0.0051	0.077	0.008	0.0123	0.00036	0.00438	0.00033	0.12383		78.8	2.3	76.1	7.4	90	200	78.8	2.3		2.54639
	Zircon-30	545	624	1.14495	0.0501	0.0027	0.1838	0.01	0.0267	0.00057	0.00836	0.0004	0.25155		169.9	3.6	171.1	8.6	209	130	169.9	3.6		0.873397
	Zircon-31	509	316	0.620825	0.0497	0.0032	0.09	0.0055	0.01326	0.00031	0.00431	0.00024	0.10104		84.9	1.9	87.4	5.1	190	140	84.9	1.9		1.61076
	Zircon-32	261	97.8	0.374713	0.051	0.0044	0.102	0.0085	0.01472	0.00045	0.00479	0.00039	0.041132		94.2	2.9	98.5	7.8	220	180	94.2	2.9		2.66871
	Zircon-33	147.6	71.8	0.48645	0.0505	0.0057	0.109	0.011	0.01611	0.00059	0.00563	0.00042	-0.17675		103	3.7	105	9.7	200	210	103	3.7		2.05571
	Zircon-34	187.9	140.5	0.747738	0.049	0.0041	0.1043	0.0079	0.01594	0.00054	0.0049	0.00037	0.081307		102	3.4	100.5	7.3	120	170	102	3.4		1.33737
	Zircon-35	161.1	108	0.670391	0.114	0.015	0.158	0.021	0.00976	0.00045	0.00549	0.00064	0.35427		62.6	2.9	146	19	1720	270	62.6	2.9		1.49167
	Zircon-36	274	172.7	0.630292	0.0472	0.0048	0.0706	0.0064	0.01118	0.00037	0.00354	0.00025	-0.088813		71.7	2.4	69	6	10	200	71.7	2.4		1.58657
	Zircon-37	168	83.5	0.497024	0.0464	0.0089	0.0346	0.0067	0.00547	0.00029	0.00189	0.00026	0.18941		35.2	1.8	34.3	6.6	-30	360	35.2	1.8		2.01198
	Zircon-38	413	312	0.755448	0.0492	0.0043	0.0343	0.003	0.00511	0.00021	0.00169	0.00013	0.23618		32.9	1.3	34.2	3	130	180	32.9	1.3		1.32372
	Zircon-39	479	442	0.922756	0.0546	0.0098	0.0852	0.02	0.01141	0.00047	0.00405	0.00049	0.13844		73.1	3	84.4	18	420	250	73.1	3		1.08371
	Zircon-40	371	206	0.555256	0.0533	0.0033	0.1019	0.0082	0.01419	0.00056	0.00468	0.00051	0.18894		90.8	3.5	98.4	7.5	310	140	90.8	3.5		1.80097
	Zircon-41	317	260	0.820189	0.0496	0.0031	0.1867	0.011	0.02717	0.00065	0.00874	0.00048	0.17186		172.8	4.1	173.5	9.5	160	130	172.8	4.1		1.21923
	Zircon-42	298	165.8	0.556376	0.0711	0.006	0.13	0.011	0.01341	0.00037	0.00557	0.00039	0.10664		85.8	2.3	123	9.7	920	170	85.8	2.3		1.79735
	Zircon-43	401	222	0.553616	0.0481	0.0036	0.0902	0.0064	0.01365	0.00037	0.00452	0.0003	-0.0088616		87.7	2.3	88.4	6.2	80	150	87.7	2.3		1.80631
	Zircon-44	364	191.1	0.525	0.0492	0.0064	0.0355	0.0041	0.00526	0.00018	0.00176	0.00013	-0.23503		33.8	1.1	35.4	4	180	240	33.8	1.1		1.90476
	Zircon-45	382	208	0.544503	0.0487	0.0036	0.0969	0.0069	0.0145	0.00036	0.00481	0.00029	0.040468		92.8	2.3	93.7	6.4	120	160	92.8	2.3		1.83654
	Zircon-46	389	18.22	0.046838	0.047	0.0032	0.1128	0.0081	0.0175	0.00056	0.0082	0.0012	0.15417		111.8	3.6	109.5	7.3	40	130	111.8	3.6		21.3502
	Zircon-47	945	565	0.597884	0.0463	0.0028	0.0567	0.0033	0.00888	0.00023	0.00269	0.00016	0.3098		57	1.4	56	3.2	18	130	57	1.4		1.67257
	Zircon-48	248	145	0.584677	0.0513	0.0073	0.0354	0.005	0.00528	0.00025	0.00204	0.00021	0.15074		33.9	1.6	35.2	4.8	170	270	33.9	1.6		1.71034
	Zircon-49	325	205	0.630769	0.0468	0.0036	0.0945	0.0078	0.01484	0.00044	0.00454	0.00034	-0.086549		95	2.8	91.4	7.3	30	160	95	2.8		1.58537
	Zircon-50	193.6	103.6	0.535124	0.0566	0.0048	0.096	0.0076	0.01287	0.00044	0.00405	0.00031	0.24645		82.4	2.8	92.8	7	440	180	82.4	2.8		1.86873
	Zircon-51	212.4	103.1	0.485405	0.0782	0.0054	0.15	0.01	0.0141	0.00041	0.00678	0.00049	0.17323		90.3	2.6	142	8.9	1160	150	90.3	2.6		2.06014
	Zircon-52	247	99.1	0.401215	0.0489	0.004	0.0888	0.0068	0.0129	0.00037	0.00496	0.00037	0.15378		82.6	2.3	86.1	6.3	140	160	82.6	2.3		2.49243
	Zircon-53	270	68	0.251852	0.0483	0.0037	0.1009	0.0076	0.01523	0.00044	0.00544	0.00063	0.019276		97.5	2.8	97.4	7	90	160	97.5	2.8		3.97059
	Zircon-54	533	202	0.378987	0.1525	0.011	0.2488	0.024	0.01226	0.00042	0.01314	0.0013	-0.05865		78.5	2.7	225.5	18	2356	100	78.5	2.7		2.63861
	Zircon-55	539	394	0.730983	0.0523	0.0054	0.0343	0.0034	0.0047	0.00015	0.0016	0.00012	-0.21596		30.22	0.96	34.1	3.4	300	210	30.22	0.96		1.36802
	Zircon-56	167.6	101.6	0.606205	0.0479	0.0097	0.0362	0.0066	0.00513	0.00025	0.00158	0.00017	0.017761		33	1.6	35.9	6.4	140	350	33	1.6		1.64961
	Zircon-57	592	513	0.866554	0.0518	0.0043	0.0347	0.003	0.00483	0.00015	0.001562	0.0001	0.25732		31.1	0.98	34.6	3	410	170	31.1	0.98		1.154
	Zircon-58	115.6	49.5	0.428201	0.0493	0.0055	0.114	0.012	0.01654	0.00057	0.00563	0.00053	0.129		105.7	3.6	109	11	160	230	105.7	3.6		2.33535
	Zircon-59	158.6	56.9	0.358764	0.0494	0.0054	0.113	0.012	0.01642	0.00057	0.00609	0.0005	0.069658		105	3.6	108	11	110	210	105	3.6		2.78735
	Zircon-60	213	101.4	0.476056	0.052	0.0048	0.085	0.0081	0.01181	0.00039	0.00417	0.00033	0.0067172		75.7	2.5	82.6	7.5	210	190	75.7	2.5		2.10059
	Zircon-61	234	165.8	0.708547	0.0465	0.0045	0.0803	0.007	0.01252	0.00044	0.00412	0.00028	-0.14174		80.2	2.8	78.2	6.5	-10	190	80.2	2.8		1.41134
	Zircon-62	388	740	1.90722	0.0497	0.0068	0.034	0.0041	0.00513	0.0002	0.00174	0.00013	0.012794		33	1.3	34.6	4	110	240	33	1.3		0.524324
	Zircon-63	124.4	104.4	0.839228	0.05	0.01	0.098	0.021	0.01426	0.00065	0.00481	0.0006	-0.36366		91.3	4.1	94	19	130	270	91.3	4.1		1.19157
	Zircon-64	333	95	0.285285	0.0518	0.0058	0.101	0.013	0.01485	0.00043	0.00508	0.00066	0.1425		95	2.7	100	12	220	200	95	2.7		3.50526
	Zircon-65	1270	673	0.529921	0.0554	0.0028	0.0786	0.0042	0.01074	0.00024	0.0037	0.0002	0.30657		68.9	1.6	76.8	3.8	400	120	68.9	1.6		1.88707
	Zircon-66	247	137.2	0.555466	0.0523	0.0049	0.105	0.0092	0.0148	0.00039	0.00465	0.00035	-0.13426		94.7	2.5	101.1	8.5	270	200	94.7	2.5		1.80029
	Zircon-67	335	102.4	0.305672	0.0558	0.0052	0.1085	0.01	0.0137	0.00038	0.00591	0.00044	-0.060619		87.7	2.4	104.1	9.3	500	190	87.7	2.4		3.27148
	Zircon-68	129.3	50.4	0.389791	0.054	0.0056	0.111	0.012	0.0143	0.00053	0.00448	0.0004	0.23942		91.5	3.4	106	12	290	220	91.5	3.4		2.56548
	Zircon-69	189	86.8	0.459259	0.075	0.0064	0.162	0.014	0.01615	0.00053	0.00817	0.00063	0.081967		103.2	3.4	152	12	970	180	103.2	3.4		2.17742
	Zircon-70	367	192.5	0.524523	0.0514	0.004	0.0891	0.0064	0.01283	0.00033	0.00402	0.00027	-0.12026		82.2	2.1	86.4	5.9	220	160	82.2	2.1		1.90649
	Zircon-71	375	369	0.984	0.0487	0.004	0.0977	0.0077	0.01478	0.00036	0.00457	0.00027	-0.070794		94.6	2.3	94.4	7.1	100	170	94.6	2.3		1.01626
	Zircon-72	230.5	67.6	0.293275	0.0509	0.0045	0.097	0.0081	0.01405	0.0004	0.0048	0.00043	0.029742		89.9	2.5	93.7	7.6	230	180	89.9	2.5		3.40976
	Zircon-73	308	97.9	0.317857	0.0514	0.0038	0.1028	0.01	0.01452	0.00059	0.00455	0.00037	-0.16923		92.9	3.8	99.2	9	240	160	92.9	3.8		3.14607
	Zircon-74	444	147.3	0.331757	0.0498	0.0038	0.0948	0.0067	0.01406	0.00037	0.00447	0.00029	0.083872		90	2.4	91.8	6.3	180	150	90	2.4		3.01426
	Zircon-75	870	439	0.504598	0.0499	0.0031	0.0958	0.0055	0.01407	0.00031	0.00443	0.00025	-0.050037		90.1	2	92.8	5.3	170	140	90.1	2		1.98178
	Zircon-76	363	237	0.652893	0.0648	0.0055	0.1174	0.009	0.0132	0.00046	0.00542	0.00036	0.028999		84.5	2.9	112.4	8.1	700	180	84.5	2.9		1.53165
	Zircon-77	452	217	0.480088	0.0473	0.0041	0.0774	0.0066	0.01196	0.00032	0.00385	0.00023	-0.029378		76.7	2	75.5	6.2	70	180	76.7	2		2.08295
	Zircon-78	233.5	168.3	0.720771	0.0513	0.0052	0.0783	0.0075	0.01149	0.0004	0.00399	0.00029	0.022622		73.6	2.5	76.3	7.1	210	200	73.6	2.5		1.3874
	Zircon-79	807	704	0.872367	0.05	0.0032	0.0857	0.0052	0.01265	0.00029	0.00383	0.0002	0.11389		81	1.9	83.4	4.9	170	130	81	1.9		1.14631
	Zircon-80	551	354	0.642468	0.052	0.0098	0.0813	0.017	0.01147	0.00032	0.00382	0.00045	-0.18428		73.5	2	79.2	15	290	250	73.5	2		1.5565
	Zircon-81	373	410	1.0992	0.0494	0.0045	0.1041	0.0082	0.01509	0.00043	0.00472	0.0003	0.038821		96.5	2.7	100.3	7.6	170	180	96.5	2.7		0.909756
	Zircon-82	129.8	51.4	0.395994	0.0476	0.0059	0.102	0.012	0.01607	0.00059	0.00556	0.00067	-0.040101		102.8	3.8	100	11	40	240	102.8	3.8		2.52529
	Zircon-83	400	274	0.685	0.0492	0.0044	0.0894	0.008	0.01349	0.00034	0.00418	0.00027	-0.14232		86.4	2.2	86.7	7.4	140	180	86.4	2.2		1.45985
	Zircon-84	173.1	108.9	0.629116	0.0515	0.005	0.107	0.011	0.01545	0.00048	0.00482	0.00035	0.28581		98.9	3	102.6	9.6	250	210	98.9	3		1.58953
	Zircon-85	255	157	0.615686	0.0467	0.0041	0.0938	0.0083	0.01432	0.00045	0.00467	0.00034	0.053983		91.7	2.8	91.7	7.4	60	180	91.7	2.8		1.6242
	Zircon-86	470	290	0.617021	0.0485	0.0057	0.0339	0.0039	0.00505	0.00019	0.00159	0.00013	0.16792		32.5	1.2	33.7	3.9	120	230	32.5	1.2		1.62069
	Zircon-87	572	347	0.606643	0.0522	0.0042	0.1027	0.0096	0.01468	0.00043	0.00474	0.00037	-0.19015		94	2.7	100.9	8.7	290	160	94	2.7		1.64841
	Zircon-88	318	226.7	0.712893	0.0468	0.0041	0.0928	0.0076	0.01458	0.0004	0.00449	0.0003	-0.1004		93.3	2.6	89.8	7	10	170	93.3	2.6		1.40273
	Zircon-89	487	336	0.689938	0.0487	0.0038	0.0894	0.0063	0.01323	0.00038	0.00418	0.00027	0.77187		84.7	2.4	86.6	5.8	100	160	84.7	2.4		1.4494
	Zircon-90	486	443	0.911523	0.0482	0.0062	0.0951	0.013	0.01436	0.00057	0.00431	0.00043	0.20577		91.9	3.6	92	12	130	220	91.9	3.6		1.09707
	Zircon-91	218	114.4	0.524771	0.0556	0.0053	0.109	0.0097	0.01416	0.00048	0.00469	0.00043	0.114		90.6	3.1	106.6	8.9	380	180	90.6	3.1		1.90559
	Zircon-92	331	166.9	0.50423	0.0504	0.0028	0.2347	0.012	0.03371	0.00074	0.01051	0.00058	0.25819		213.7	4.6	213.7	10	218	120	213.7	4.6		1.98322
	Zircon-93	230.1	302	1.31247	0.0497	0.0046	0.0758	0.0063	0.01096	0.00042	0.00372	0.00022	-0.10091		70.3	2.7	74	5.7	200	190	70.3	2.7		0.761921
	Zircon-94	335	167.5	0.5	0.0475	0.0059	0.0335	0.0038	0.0052	0.00018	0.00186	0.00012	0.13053		33.4	1.2	33.4	3.7	30	240	33.4	1.2		2
	Zircon-95	307	174.3	0.567752	0.0494	0.0041	0.0785	0.0063	0.01175	0.00031	0.00379	0.00028	0.12665		75.3	2	76.6	6	130	170	75.3	2		1.76133
	Zircon-96	332	138.8	0.418072	0.0455	0.0036	0.1201	0.009	0.01882	0.00051	0.00617	0.00041	-0.020583		120.2	3.2	114.8	8.4	-10	160	120.2	3.2		2.39193
	Zircon-97	149.9	116.2	0.775183	0.049	0.007	0.0669	0.0091	0.01016	0.00042	0.00307	0.00035	0.12617		65.1	2.7	68.1	8.6	80	290	65.1	2.7		1.29002
	Zircon-98	44.6	33.8	0.757848	0.056	0.018	0.038	0.013	0.00566	0.00072	0.00286	0.00051	-0.085285		36.4	4.6	37	13	-50	550	36.4	4.6		1.31953
	Zircon-99	204.1	188	0.921117	0.0559	0.0071	0.126	0.015	0.01647	0.00058	0.00564	0.00039	-0.017563		105.3	3.7	120	13	320	250	105.3	3.7		1.08564
	Zircon-100	196	87.4	0.445918	0.0651	0.0086	0.126	0.016	0.01402	0.00052	0.00586	0.00057	-0.079692		89.8	3.3	120	14	710	230	89.8	3.3		2.24256
	Zircon-101	197.2	71.5	0.362576	0.1032	0.0043	4.314	0.17	0.301	0.0057	0.0873	0.0042	0.37239		1696	28	1695	33	1678	77	1678	28		2.75804
	Zircon-102	366	206.9	0.565301	0.0595	0.0035	0.1279	0.0071	0.01574	0.00045	0.00573	0.00039	0.16004		100.7	2.9	122.1	6.4	560	130	100.7	2.9		1.76897
	Zircon-103	597	258	0.432161	0.079	0.005	0.1484	0.0091	0.01365	0.00033	0.00714	0.00042	0.17881		87.4	2.1	140.2	8	1150	130	87.4	2.1		2.31395
	Zircon-104	529	296	0.559546	0.0492	0.0029	0.1454	0.0084	0.0213	0.00048	0.00664	0.00038	-0.055835		135.9	3	138.5	7.2	170	130	135.9	3		1.78716
	Zircon-105	370	111.6	0.301622	0.0493	0.0038	0.1006	0.0068	0.01455	0.00043	0.00518	0.00042	0.12253		93.1	2.7	97.1	6.3	160	150	93.1	2.7		3.31541
	Zircon-106	180.5	88.5	0.490305	0.048	0.0088	0.0338	0.0078	0.00531	0.00038	0.00198	0.00024	-0.16161		34.1	2.4	34.6	7.6	-40	330	34.1	2.4		2.03955
	Zircon-107	298	153	0.513423	0.0479	0.0046	0.1091	0.0096	0.01673	0.00046	0.00542	0.00034	0.06702		106.9	2.9	104.7	8.8	100	190	106.9	2.9		1.94771
	Zircon-108	196	71	0.362245	0.0444	0.0052	0.1011	0.011	0.01641	0.00067	0.00596	0.00054	0.092379		104.9	4.3	97.2	9.8	-70	190	104.9	4.3		2.76056
	Zircon-109	632	173	0.273734	0.047	0.0033	0.074	0.005	0.01138	0.00029	0.00374	0.00035	0.24515		72.9	1.9	72.3	4.8	50	140	72.9	1.9		3.65318
	Zircon-110	351	136	0.387464	0.0516	0.0094	0.102	0.022	0.0136	0.00052	0.00527	0.0017	0.12781		87.1	3.3	98	18	290	200	87.1	3.3		2.58088
	Sample: Yaq-04-17: medium-grained sandstone, 27°24´57.41" N and 112°24´11.72" O
	Zircon-01	75	36.2	0.482667	0.0456	0.011	0.099	0.021	0.01549	0.00082	0.00424	0.00092	-0.048969		99.1	5.2	98	20	80	380	99.1	5.2		2.07182
	Zircon-02	715	216	0.302098	0.0472	0.0033	0.0978	0.0064	0.01513	0.00041	0.00421	0.0005	0.045378		96.8	2.6	94.7	5.9	69	150	96.8	2.6		3.31019
	Zircon-03	361	79.1	0.219114	0.0523	0.0046	0.105	0.0085	0.01468	0.00039	0.0056	0.00062	-0.05215		93.9	2.5	101.1	7.8	270	180	93.9	2.5		4.56384
	Zircon-04	15.1	8.38	0.554967	0.117	0.086	0.026	0.04	0.00578	0.00081	0.0017	0.0015	-0.1238		37.1	5.2	22	38	-1900	1700	37.1	5.2		1.80191
	Zircon-05	150	52.5	0.35	0.0532	0.0058	0.175	0.019	0.02448	0.00081	0.00873	0.00099	0.2206		155.9	5.1	165	16	300	210	155.9	5.1		2.85714
	Zircon-06	323	207	0.640867	0.0529	0.005	0.1038	0.0088	0.01457	0.00042	0.00441	0.00048	-0.13019		93.2	2.6	100.1	8	260	190	93.2	2.6		1.56039
	Zircon-07	54.7	25.3	0.462523	0.0471	0.0083	0.109	0.02	0.01519	0.00067	0.00468	0.00077	0.13093		97.2	4.3	103	18	100	350	97.2	4.3		2.16206
	Zircon-08	36.8	15.1	0.410326	0.053	0.014	0.111	0.027	0.01546	0.00072	0.00412	0.00087	-0.099859		98.9	4.8	103	24	10	420	98.9	4.8		2.43709
	Zircon-09	186	97.2	0.522581	0.0489	0.0054	0.101	0.011	0.01477	0.00057	0.0049	0.00062	-0.0047419		94.5	3.6	97	10	150	230	94.5	3.6		1.91358
	Zircon-10	157	69.8	0.444586	0.0504	0.006	0.1006	0.011	0.01486	0.0007	0.0046	0.00058	0.01921		95.1	4.5	96.9	10	180	240	95.1	4.5		2.24928
	Zircon-11	143	120	0.839161	0.0578	0.0065	0.119	0.013	0.01533	0.0005	0.00478	0.00056	-0.13236		98	3.2	114	11	590	250	98	3.2		1.19167
	Zircon-12	516	149	0.28876	0.0517	0.0043	0.1072	0.0091	0.01469	0.00044	0.00455	0.0006	0.0025251		94	2.8	103.3	8.3	280	160	94	2.8		3.46309
	Zircon-13	1000	430	0.43	0.0572	0.0056	0.0369	0.0034	0.00493	0.00015	0.00174	0.00019	-0.22279		31.7	0.97	36.7	3.3	470	200	31.7	0.97		2.32558
	Zircon-14	125	61	0.488	0.055	0.008	0.0386	0.0056	0.00531	0.00026	0.00202	0.00035	0.22908		34.1	1.6	38.2	5.5	490	280	34.1	1.6		2.04918
	Zircon-15	566	164	0.289753	0.0469	0.0037	0.0957	0.0072	0.01459	0.0004	0.00466	0.00051	0.13489		93.4	2.5	93.2	6.8	50	170	93.4	2.5		3.45122
	Zircon-16	174	94	0.54023	0.0507	0.0058	0.0733	0.0094	0.01074	0.00039	0.00344	0.00043	0.030148		68.8	2.5	72.5	8.7	240	240	68.8	2.5		1.85106
	Zircon-17	309	191	0.618123	0.0718	0.0082	0.134	0.016	0.01373	0.00039	0.00596	0.00071	0.39729		87.9	2.5	127	14	910	180	87.9	2.5		1.6178
	Zircon-18	497	291	0.585513	0.0507	0.0037	0.1641	0.011	0.02381	0.00063	0.0073	0.00075	0.069396		151.7	4	155	9.6	206	160	151.7	4		1.7079
	Zircon-19	321	160	0.498442	0.05	0.0051	0.145	0.015	0.02113	0.00063	0.00632	0.00081	0.06412		134.8	4	137.2	13	180	210	134.8	4		2.00625
	Zircon-20	574	184	0.320557	0.048	0.0039	0.0933	0.0072	0.01409	0.00035	0.0041	0.00045	0.083879		90.2	2.2	90.4	6.7	100	170	90.2	2.2		3.11957
	Zircon-21	88	49	0.556818	0.0516	0.0084	0.124	0.021	0.01744	0.00072	0.00581	0.00076	0.25965		111.5	4.6	117	19	120	300	111.5	4.6		1.79592
	Zircon-22	329	215	0.653495	0.0494	0.0051	0.0985	0.0094	0.01453	0.00041	0.00473	0.0005	-0.033452		93	2.6	95	8.8	170	200	93	2.6		1.53023
	Zircon-23	857	335	0.390898	0.0467	0.0032	0.0923	0.0061	0.01416	0.00037	0.00429	0.00044	0.21733		90.6	2.3	89.6	5.7	34	150	90.6	2.3		2.55821
	Zircon-24	94	48	0.510638	0.0531	0.0076	0.123	0.017	0.01741	0.0007	0.00608	0.00075	0.070189		111.3	4.4	117	15	220	290	111.3	4.4		1.95833
	Zircon-25	227	90.5	0.398678	0.044	0.0048	0.0714	0.0069	0.01157	0.00037	0.0038	0.00045	-0.1886		74.2	2.4	69.9	6.5	-50	200	74.2	2.4		2.50829
	Zircon-26	742	520	0.700809	0.0433	0.004	0.0295	0.0025	0.00492	0.00016	0.00159	0.00017	0.0040789		31.61	1	29.5	2.5	-130	180	31.61	1		1.42692
	Zircon-27	691	381	0.551375	0.0595	0.016	0.0366	0.011	0.00456	0.00024	0.00149	0.00039	0.41278		29.3	1.5	36.4	11	490	300	29.3	1.5		1.81365
	Zircon-28	243	160	0.658436	0.0521	0.0089	0.0357	0.0056	0.00503	0.00024	0.00181	0.00023	-0.11942		32.4	1.6	35.5	5.5	220	330	32.4	1.6		1.51875
	Zircon-29	364	248	0.681319	0.048	0.0061	0.0326	0.0033	0.0048	0.00021	0.00156	0.00018	-0.03181		30.9	1.3	32.5	3.2	120	210	30.9	1.3		1.46774
	Zircon-30	209	145	0.69378	0.0503	0.0089	0.0351	0.0053	0.00504	0.00022	0.00167	0.00024	-0.22276		32.4	1.4	35.6	5.4	160	320	32.4	1.4		1.44138
	Zircon-31	91	60.9	0.669231	0.058	0.011	0.084	0.015	0.01138	0.00059	0.00311	0.00053	0.13542		73	3.8	81	14	420	330	73	3.8		1.49425
	Zircon-32	222	84	0.378378	0.056	0.0094	0.104	0.024	0.01504	0.0006	0.00502	0.0011	0.011882		96.3	3.8	105	20	370	250	96.3	3.8		2.64286
	Zircon-33	531	260	0.489642	0.0474	0.0042	0.0846	0.0069	0.01276	0.00039	0.00384	0.00045	0.010319		81.7	2.5	82.3	6.5	110	180	81.7	2.5		2.04231
	Zircon-34	285	149	0.522807	0.0521	0.0041	0.1705	0.013	0.02389	0.00067	0.00733	0.00077	0.29274		152.2	4.2	159.5	11	260	170	152.2	4.2		1.91275
	Zircon-35	186	199	1.06989	0.0475	0.0065	0.0726	0.0099	0.011	0.00041	0.0038	0.00042	0.035566		70.5	2.6	70.6	9.4	30	260	70.5	2.6		0.934673
	Sample: Yaq-05-17: medium-grained sandstone, 27°24´56.18"N and 112°24´07.43"O
	Zircon-01	153	83.6	0.546405	0.0465	0.0074	0.096	0.013	0.01595	0.00079	0.00525	0.00054	-0.087519		102	5	92	12	-90	270	102	5		1.83014
	Zircon-02	207	153.3	0.74058	0.045	0.0057	0.098	0.011	0.01534	0.00051	0.00501	0.00029	-0.026125		98.1	3.3	94	11	-10	240	98.1	3.3		1.35029
	Zircon-03	85	29.4	0.345882	0.047	0.012	0.099	0.022	0.01506	0.00088	0.00587	0.00089	-0.17631		96.4	5.6	93	20	40	430	96.4	5.6		2.89116
	Zircon-04	483	299	0.619048	0.0559	0.0051	0.0922	0.0077	0.012	0.00034	0.00402	0.00025	0.062039		76.9	2.2	89.2	7.2	410	180	76.9	2.2		1.61538
	Zircon-05	306	141	0.460784	0.054	0.006	0.107	0.011	0.01433	0.00039	0.00517	0.0004	-0.52635		92.3	2.5	105	10	370	200	92.3	2.5		2.17021
	Zircon-06	126	72	0.571429	0.059	0.016	0.092	0.028	0.01273	0.00068	0.0047	0.00097	-0.42136		81.5	4.3	88	24	170	410	81.5	4.3		1.75
	Zircon-07	226	164	0.725664	0.0497	0.0074	0.0698	0.0097	0.01001	0.00036	0.00311	0.00026	0.14442		64.2	2.3	68.1	9.2	200	290	64.2	2.3		1.37805
	Zircon-08	101	33.7	0.333663	0.0686	0.0087	0.153	0.019	0.0166	0.00063	0.0065	0.0012	0.061649		106.1	4	147	17	750	280	106.1	4		2.99703
	Zircon-09	179.2	130.6	0.728795	0.0491	0.0067	0.1	0.013	0.0149	0.00059	0.00469	0.00041	-0.077024		95.3	3.7	96	12	80	260	95.3	3.7		1.37213
	Zircon-10	123.2	71.4	0.579545	0.0466	0.0078	0.1	0.017	0.01618	0.00061	0.0054	0.00051	-0.0030984		103.5	3.9	96	15	-80	290	103.5	3.9		1.72549
	Zircon-12	1090	660	0.605505	0.134	0.024	0.105	0.042	0.00568	0.00058	0.00398	0.0017	-0.29686		36.5	3.7	101	33	2090	190	36.5	3.7		1.65152
	Zircon-13	58.5	24.8	0.423932	0.059	0.014	0.131	0.028	0.01585	0.00092	0.00516	0.0011	-0.078352		101.3	5.9	125	26	420	420	101.3	5.9		2.35887
	Zircon-14	278	214	0.769784	0.0483	0.0086	0.0867	0.013	0.01293	0.00047	0.00365	0.00044	-0.22779		82.8	3	84.1	12	90	290	82.8	3		1.29907
	Zircon-15	208	98	0.471154	0.0514	0.0067	0.091	0.011	0.01356	0.00049	0.00438	0.00042	-0.099176		86.8	3.1	87.5	10	160	250	86.8	3.1		2.12245
	Zircon-16	83.9	41.4	0.493445	0.0474	0.01	0.096	0.019	0.01399	0.00079	0.00413	0.00059	-0.018131		89.5	5	91	17	60	370	89.5	5		2.02657
	Zircon-17	483	55.2	0.114286	0.051	0.0028	0.1741	0.0089	0.02494	0.00052	0.00774	0.00079	0.055568		158.8	3.3	162.7	7.7	221	120	158.8	3.3		8.75
	Zircon-18	98.8	49.3	0.498988	0.073	0.0093	0.157	0.02	0.01551	0.00077	0.00733	0.00077	0.0039067		99.2	4.9	146	17	870	270	99.2	4.9		2.00406
	Zircon-19	134.3	39.5	0.294118	0.0527	0.0088	0.115	0.016	0.01542	0.00061	0.00546	0.00061	-0.28123		98.6	3.8	110	15	210	300	98.6	3.8		3.4
	Zircon-20	56.8	17.2	0.302817	0.044	0.014	0.086	0.025	0.01436	0.00083	0.0047	0.0015	0.0047913		91.9	5.3	84	23	-260	490	91.9	5.3		3.30233
	Zircon-21	1250	804	0.6432	0.0486	0.0033	0.0336	0.0022	0.00507	0.00014	0.001485	8.2e-05	0.28134		32.61	0.9	33.5	2.1	120	150	32.61	0.9		1.55473
	Zircon-22	201	101.4	0.504478	0.0491	0.0057	0.09	0.0098	0.01379	0.00049	0.00427	0.00038	-0.04423		88.3	3	87	9.2	70	240	88.3	3		1.98225
	Zircon-23	513	255	0.497076	0.0536	0.0041	0.0359	0.0025	0.00504	0.00014	0.00169	0.0001	0.38735		32.4	0.92	37.3	2.5	350	180	32.4	0.92		2.01176
	Zircon-24	64.1	26.3	0.410296	0.05	0.011	0.097	0.02	0.01435	0.00087	0.00425	0.00085	-0.0028593		91.8	5.5	92	18	50	410	91.8	5.5		2.43726
	Zircon-25	53.6	23.5	0.438433	0.07	0.015	0.155	0.027	0.0162	0.00099	0.00531	0.001	0.048375		103.4	6.3	143	22	700	370	103.4	6.3		2.28085
	Zircon-26	491	113	0.230143	0.0465	0.0035	0.0753	0.0055	0.01167	0.0003	0.00369	0.00037	-0.19535		74.8	1.9	73.6	5.2	60	160	74.8	1.9		4.34513
	Zircon-27	748	220	0.294118	0.0475	0.0033	0.0729	0.005	0.01139	0.00027	0.00339	0.00024	0.10492		73	1.7	72.8	4.8	60	140	73	1.7		3.4
	Zircon-28	73.3	43.2	0.589359	0.059	0.0097	0.111	0.018	0.01452	0.00056	0.00514	0.00076	-0.13682		92.9	3.6	105	16	310	300	92.9	3.6		1.69676
	Zircon-29	140.7	42.3	0.30064	0.0442	0.0071	0.09	0.014	0.01515	0.00062	0.0041	0.00064	0.21566		96.9	3.9	86	13	-140	280	96.9	3.9		3.32624
	Zircon-30	288	154	0.534722	0.0487	0.0047	0.0841	0.0081	0.01261	0.00042	0.0041	0.00029	0.1036		80.8	2.7	81.7	7.5	110	200	80.8	2.7		1.87013
	Zircon-31	49	27.8	0.567347	0.044	0.012	0.09	0.025	0.01514	0.0009	0.00612	0.00075	-0.0029126		96.8	5.7	85	23	-180	440	96.8	5.7		1.76259
	Zircon-32	168	42	0.25	0.053	0.0064	0.115	0.012	0.01552	0.00055	0.00483	0.00072	-0.08857		99.3	3.5	110	11	240	240	99.3	3.5		4
	Zircon-33	263	181	0.688213	0.0476	0.0046	0.0945	0.0086	0.01424	0.00046	0.00455	0.00028	0.054304		91.1	2.9	91.4	8.1	50	200	91.1	2.9		1.45304
	Zircon-34	132.9	61.6	0.463506	0.0539	0.0074	0.107	0.014	0.01512	0.00055	0.00517	0.00057	0.17194		96.7	3.5	105	14	280	280	96.7	3.5		2.15747
	Zircon-35	197	109	0.553299	0.0473	0.0058	0.109	0.015	0.01615	0.00061	0.00463	0.00054	0.066898		103.3	3.9	104	13	60	250	103.3	3.9		1.80734
	Zircon-36	184	80.9	0.439674	0.0495	0.0076	0.0706	0.0098	0.01069	0.00049	0.0038	0.00043	-0.13714		68.5	3.1	68.8	9.3	40	280	68.5	3.1		2.27441
	Zircon-37	136	84.8	0.623529	0.047	0.0072	0.099	0.016	0.01587	0.00058	0.00479	0.0004	0.12543		101.5	3.7	95	15	0	280	101.5	3.7		1.60377
	Zircon-38	137.7	78.6	0.570806	0.0524	0.006	0.113	0.013	0.01553	0.00048	0.00523	0.00048	0.15618		99.3	3	107	12	230	240	99.3	3		1.75191
	Zircon-39	123	72.1	0.586179	0.126	0.022	0.093	0.014	0.00548	0.00039	0.00274	0.00037	-0.022799		35.3	2.5	90	12	2010	310	35.3	2.5		1.70596
	Zircon-40	109	42.7	0.391743	0.0513	0.0068	0.105	0.013	0.01552	0.00071	0.005	0.00051	0.12335		99.3	4.5	100	13	70	290	99.3	4.5		2.55269
	Zircon-41	480	86.1	0.179375	0.0531	0.0061	0.113	0.012	0.01591	0.00057	0.00537	0.00043	-0.16927		101.8	3.6	108	11	230	240	101.8	3.6		5.57491
	Zircon-42	291	165.8	0.569759	0.0529	0.0053	0.1045	0.0093	0.0146	0.00043	0.00489	0.00035	-0.027369		93.4	2.7	100.5	8.6	260	200	93.4	2.7		1.75513
	Zircon-43	255	176	0.690196	0.079	0.05	0.053	0.083	0.00513	0.00088	0.00197	0.0017	0.035337		33	6.1	51	62	1060	420	33	6.1		1.44886
	Zircon-44	106.6	68.5	0.642589	0.0531	0.0095	0.096	0.018	0.01364	0.00049	0.00472	0.00048	0.063712		87.3	3.1	94	17	240	340	87.3	3.1		1.5562
	Zircon-45	189	120.9	0.639683	0.0557	0.007	0.105	0.012	0.01453	0.00062	0.00452	0.00031	-0.15717		93	3.9	101	11	390	230	93	3.9		1.56328
	Zircon-46	146.4	91.6	0.625683	0.0535	0.0063	0.117	0.013	0.01644	0.00062	0.00524	0.00033	-0.025658		105.1	3.9	114	12	240	240	105.1	3.9		1.59825
	Zircon-47	83.9	47.9	0.570918	0.0583	0.0086	0.123	0.018	0.01513	0.0007	0.00639	0.00062	0.22095		96.8	4.4	116	16	390	310	96.8	4.4		1.75157
	Zircon-48	233	119.8	0.514163	0.052	0.012	0.037	0.0078	0.00507	0.00026	0.00184	0.00024	-0.048003		32.6	1.7	36.5	7.6	20	400	32.6	1.7		1.94491
	Zircon-49	88.4	56.3	0.636878	0.0441	0.0081	0.097	0.019	0.01508	0.0006	0.00502	0.00063	0.20563		96.4	3.8	92	17	-90	330	96.4	3.8		1.57016
	Zircon-50	151.4	49.8	0.32893	0.0613	0.0077	0.128	0.015	0.01522	0.0005	0.00633	0.00059	0.09102		97.4	3.2	121	13	590	250	97.4	3.2		3.04016
	Zircon-51	177	105	0.59322	0.0539	0.0066	0.1	0.012	0.01424	0.0005	0.00424	0.00041	0.072055		91.1	3.2	98	11	240	250	91.1	3.2		1.68571
	Zircon-52	211	115	0.545024	0.053	0.016	0.106	0.042	0.01481	0.00078	0.00511	0.00091	0.34776		94.8	4.9	102	35	220	290	94.8	4.9		1.83478
	Zircon-53	189.3	96.4	0.509245	0.0508	0.0055	0.139	0.014	0.02024	0.00075	0.00695	0.00052	0.16505		129.2	4.8	132	13	270	200	129.2	4.8		1.96369
	Zircon-54	148	114.3	0.772297	0.0501	0.0061	0.115	0.012	0.01738	0.00069	0.00547	0.00039	-0.18851		111.1	4.4	109	11	130	240	111.1	4.4		1.29484
	Zircon-55	387	190	0.490956	0.0439	0.0054	0.0835	0.0093	0.01378	0.0005	0.00449	0.00037	-0.15913		88.2	3.2	84.1	8.4	-50	220	88.2	3.2		2.03684
	Zircon-56	53.8	25.2	0.468401	0.047	0.013	0.088	0.025	0.01561	0.00078	0.0055	0.0011	0.10897		99.8	5	86	24	-120	470	99.8	5		2.13492
	Zircon-57	253	117	0.462451	0.0505	0.0061	0.096	0.011	0.01387	0.00048	0.00425	0.00037	-0.11897		88.8	3	93	10	170	220	88.8	3		2.16239
	Zircon-58	251	95.7	0.381275	0.0496	0.0057	0.0846	0.0091	0.01262	0.00036	0.0041	0.0003	-0.12303		80.8	2.3	82.1	8.5	130	220	80.8	2.3		2.62278
	Zircon-59	325	101.2	0.311385	0.0482	0.005	0.108	0.011	0.01588	0.00058	0.0049	0.00039	0.35209		101.6	3.7	103.8	10	130	200	101.6	3.7		3.21146
	Zircon-60	64	37.8	0.590625	0.057	0.022	0.032	0.015	0.0049	0.00038	0.0019	0.00068	0.1705		31.5	2.4	31	15	-180	680	31.5	2.4		1.69312
	Zircon-61	138	33.8	0.244928	0.0543	0.0073	0.104	0.013	0.01477	0.00059	0.00471	0.00089	-0.096485		95.2	3.7	105	12	320	270	95.2	3.7		4.08284
	Zircon-62	263	120.2	0.457034	0.0485	0.0036	0.1122	0.0086	0.01713	0.00058	0.00528	0.00042	0.091191		109.5	3.7	107.8	7.7	100	150	109.5	3.7		2.18802
	Zircon-63	133.5	166	1.24345	0.074	0.023	0.038	0.011	0.00493	0.00033	0.00176	0.00019	-0.23622		31.7	2.1	38	11	350	550	31.7	2.1		0.804217
	Zircon-64	40.8	16.3	0.39951	0.045	0.015	0.091	0.032	0.0136	0.0011	0.0058	0.0017	0.25434		87.4	6.7	83	29	-80	510	87.4	6.7		2.50307
	Zircon-65	121	60	0.495868	0.0531	0.0069	0.103	0.015	0.01516	0.00072	0.00552	0.00059	0.5113		97	4.6	103	14	240	290	97	4.6		2.01667
	Zircon-66	144	130.5	0.90625	0.484	0.022	1.571	0.08	0.0233	0.00085	0.0313	0.0019	0.35186		148.5	5.4	957	31	4197	66	4197	5.4		1.10345
	Zircon-67	661	481	0.727685	0.0499	0.0032	0.0715	0.0045	0.01053	0.00023	0.00345	0.00017	0.1325		67.5	1.4	70.7	4.2	210	130	67.5	1.4		1.37422
	Zircon-68	233	66.3	0.284549	0.0905	0.0096	0.187	0.019	0.016	0.00054	0.0089	0.0011	0.12657		102.3	3.4	179	18	1340	210	102.3	3.4		3.51433
	Zircon-69	190.3	131.4	0.690489	0.0452	0.005	0.0924	0.0093	0.01485	0.00047	0.00433	0.0004	-0.14932		95	3	91.1	8.3	0	210	95	3		1.44825
	Zircon-70	302	136.4	0.451656	0.0458	0.0046	0.0972	0.0092	0.01539	0.00052	0.00428	0.00044	0.018173		98.4	3.3	93.8	8.5	0	200	98.4	3.3		2.21408
	Zircon-71	671	112.9	0.168256	0.0499	0.0033	0.109	0.0062	0.01569	0.00035	0.00475	0.00041	-0.088688		100.3	2.2	104.9	5.7	210	130	100.3	2.2		5.94331
	Zircon-72	66.7	29.2	0.437781	0.063	0.01	0.231	0.034	0.0278	0.0016	0.0118	0.0014	-0.39253		177	9.8	212	28	550	320	177	9.8		2.28425
	Zircon-73	307	176	0.57329	0.0509	0.0052	0.092	0.0086	0.01284	0.00041	0.00392	0.00031	-0.0474		82.2	2.6	90.4	8	230	190	82.2	2.6		1.74432
	Zircon-74	366	153	0.418033	0.0526	0.0052	0.1078	0.0085	0.0149	0.00052	0.00482	0.00039	0.22072		95.3	3.3	103.7	7.7	330	180	95.3	3.3		2.39216
	Zircon-75	84.3	46.2	0.548043	0.0479	0.011	0.11	0.025	0.01524	0.00077	0.00543	0.00074	0.17451		97.5	4.9	107	22	110	400	97.5	4.9		1.82468
	Zircon-76	128	49.9	0.389844	0.0526	0.0073	0.109	0.015	0.01537	0.00063	0.00441	0.00057	0.26961		98.3	4	104	14	170	270	98.3	4		2.56513
	Zircon-77	262	180	0.687023	0.0484	0.0042	0.147	0.013	0.02221	0.00065	0.00693	0.00039	0.096549		141.6	4.1	139	11	100	170	141.6	4.1		1.45556
	Zircon-78	93.3	68.5	0.734191	0.0399	0.008	0.105	0.018	0.01707	0.00081	0.0055	0.00057	0.080931		109.1	5.2	102	17	-80	330	109.1	5.2		1.36204
	Zircon-79	115	99	0.86087	0.049	0.025	0.038	0.022	0.0054	0.0004	0.00222	0.00047	0.079137		34.7	2.5	37	21	-60	600	34.7	2.5		1.16162
	Zircon-80	108.5	183.9	1.69493	0.0535	0.003	0.675	0.036	0.0921	0.0022	0.02677	0.0011	0.24857		568.1	13	525	22	336	130	568.1	13		0.589995
	Zircon-81	175.9	56.9	0.323479	0.0456	0.0057	0.0806	0.01	0.01297	0.00048	0.00405	0.00049	0.32574		83	3.1	78.2	9.5	0	240	83	3.1		3.09139
	Zircon-82	262	144.9	0.553053	0.0462	0.0064	0.075	0.01	0.01182	0.00038	0.00367	0.00033	0.14507		75.8	2.4	73	9.7	-30	260	75.8	2.4		1.80814
	Zircon-83	86	31.8	0.369767	0.0486	0.0083	0.112	0.02	0.01617	0.00083	0.0049	0.00086	0.03995		103.4	5.3	106	18	190	310	103.4	5.3		2.7044
	Zircon-84	92	30	0.326087	0.0441	0.0085	0.097	0.018	0.01625	0.0007	0.0054	0.00098	-0.07697		103.9	4.5	95	18	-80	340	103.9	4.5		3.06667
	Zircon-85	86.2	51	0.591647	0.055	0.01	0.127	0.023	0.01698	0.00067	0.00575	0.00075	-0.11708		108.5	4.2	120	21	380	360	108.5	4.2		1.6902
	Zircon-86	387	237	0.612403	0.0511	0.0038	0.1208	0.0086	0.01759	0.00048	0.00547	0.00032	0.17002		112.4	3.1	115.5	7.8	200	160	112.4	3.1		1.63291
	Zircon-87	298	308	1.03356	0.0524	0.006	0.0801	0.0091	0.01146	0.00044	0.00356	0.00023	0.11178		73.4	2.8	79.1	8.3	270	230	73.4	2.8		0.967532
	Zircon-88	125.7	84.1	0.669053	0.0535	0.0084	0.079	0.012	0.01116	0.00047	0.00362	0.00052	0.34722		71.5	3	76	11	200	310	71.5	3		1.49465
	Zircon-89	171.7	126.5	0.73675	0.0477	0.0065	0.099	0.013	0.0152	0.0005	0.00473	0.00039	-0.10099		97.2	3.2	95	12	120	270	97.2	3.2		1.35731
	Zircon-90	58.4	25.7	0.440068	0.0481	0.0096	0.107	0.024	0.0171	0.00098	0.00615	0.00087	0.25218		109.3	6.2	109	22	110	390	109.3	6.2		2.27237
	Zircon-91	111	94	0.846847	0.0442	0.0078	0.096	0.017	0.01469	0.00063	0.00504	0.00052	-0.041486		94	4	92	16	20	330	94	4		1.18085
	Zircon-92	89	25.8	0.289888	0.076	0.023	0.165	0.061	0.0165	0.0012	0.0089	0.0025	-0.18647		105.3	7.6	150	46	810	480	105.3	7.6		3.44961
	Zircon-93	169	93	0.550296	0.0441	0.0057	0.14	0.015	0.02218	0.00097	0.00738	0.00066	0.11893		141.4	6.1	132	14	-30	220	141.4	6.1		1.8172
	Zircon-94	367	171	0.46594	0.0451	0.0043	0.093	0.009	0.01472	0.00047	0.00466	0.00038	0.41841		94.2	3	89.5	8.3	-60	180	94.2	3		2.1462
	Zircon-95	179	65.6	0.36648	0.0493	0.0062	0.103	0.013	0.01503	0.00069	0.0052	0.00087	-0.14471		96.1	4.4	98	12	120	250	96.1	4.4		2.72866
	Zircon-96	77.2	49.7	0.643782	0.0487	0.0085	0.107	0.019	0.01678	0.00073	0.00512	0.00065	-0.21002		107.3	4.6	104	16	90	320	107.3	4.6		1.55332
	Zircon-97	388	154.6	0.398454	0.0512	0.0039	0.1029	0.0075	0.01489	0.00042	0.00499	0.00039	0.28278		95.3	2.7	99.4	6.9	250	160	95.3	2.7		2.5097
	Zircon-98	174.4	70.1	0.40195	0.0492	0.008	0.098	0.014	0.01461	0.00049	0.00533	0.00052	-0.079879		93.5	3.1	94	13	70	280	93.5	3.1		2.48787
	Zircon-99	251	75.6	0.301195	0.0514	0.0045	0.1111	0.0091	0.01581	0.00052	0.00534	0.00058	0.075249		101.1	3.3	106.6	8.6	200	180	101.1	3.3		3.32011
	Zircon-100	111.2	27.7	0.249101	0.0549	0.0077	0.11	0.017	0.01537	0.00082	0.00507	0.00081	-0.27014		98.3	5.2	105	15	370	280	98.3	5.2		4.01444
	Zircon-101	206.3	128.9	0.624818	0.0441	0.0059	0.0747	0.0099	0.01178	0.00061	0.00398	0.0004	0.05769		75.5	3.9	72.9	9.3	0	230	75.5	3.9		1.60047
	Zircon-102	189	83.7	0.442857	0.053	0.0063	0.091	0.011	0.01239	0.00052	0.00412	0.00047	0.0010351		79.4	3.3	91	12	300	270	79.4	3.3		2.25806
	Zircon-103	59.8	26.7	0.446488	0.053	0.019	0.114	0.03	0.0156	0.0012	0.00513	0.0011	-0.089865		99.5	7.6	110	42	60	550	99.5	7.6		2.2397
	Zircon-104	105	44.4	0.422857	0.061	0.014	0.132	0.027	0.01645	0.00099	0.00468	0.0017	0.29529		105.2	6.2	124	24	440	330	105.2	6.2		2.36486
	Zircon-105	286	120.8	0.422378	0.0516	0.0064	0.102	0.014	0.01453	0.00065	0.00441	0.00057	0.051944		93	4.1	98	13	270	270	93	4.1		2.36755
	Zircon-106	411	139	0.3382	0.0479	0.0042	0.0949	0.0082	0.01435	0.00035	0.0049	0.00039	-0.10068		91.9	2.2	91.8	7.6	90	180	91.9	2.2		2.95683
	Zircon-107	236	142	0.601695	0.0536	0.0058	0.1054	0.01	0.01483	0.00051	0.00483	0.00038	-0.15112		94.9	3.2	102.9	9.8	240	210	94.9	3.2		1.66197
	Zircon-108	164.5	116.6	0.708815	0.0486	0.0063	0.107	0.014	0.01497	0.0006	0.00511	0.00046	-0.064527		95.8	3.8	102	13	160	270	95.8	3.8		1.41081
	Zircon-109	754	19.7	0.0261273	0.0628	0.0054	0.274	0.033	0.03217	0.0011	0.052	0.016	0.18161		204.1	6.8	245	24	690	150	204.1	6.8		38.2741
	Zircon-110	366	280	0.765027	0.0509	0.0039	0.161	0.01	0.023	0.00057	0.00762	0.00039	-0.11478		146.6	3.6	151.2	9	190	160	146.6	3.6		1.30714
	Zircon-111	62.1	31.5	0.507246	0.0532	0.0099	0.116	0.022	0.01572	0.00094	0.00518	0.00096	-0.0049291		100.5	5.9	112	20	400	360	100.5	5.9		1.97143
	Zircon-112	121.4	42.2	0.347611	0.06	0.011	0.113	0.019	0.01522	0.00072	0.00546	0.00086	-0.19845		97.4	4.6	108	17	360	360	97.4	4.6		2.87678
	Zircon-113	139.3	67.4	0.483848	0.0641	0.012	0.132	0.023	0.0151	0.00078	0.00584	0.00093	-0.022867		96.6	5	127	20	670	300	96.6	5		2.06677
	Zircon-114	200	109	0.545	0.0495	0.0054	0.1023	0.013	0.01505	0.00051	0.00467	0.00076	0.040213		96.3	3.2	98.6	12	190	270	96.3	3.2		1.83486
	Zircon-115	202	79.1	0.391584	0.0502	0.0095	0.101	0.02	0.01488	0.00051	0.00464	0.00054	0.15378		95.2	3.2	96	18	20	350	95.2	3.2		2.55373
	Zircon-116	143	104	0.727273	0.0429	0.012	0.108	0.021	0.01576	0.00075	0.00508	0.00079	-0.033744		100.8	4.8	102	18	30	450	100.8	4.8		1.375
	Sample: Yaq-07-17: medium-granined sandstone, 27°25´35.48"N and 112°24´57.48"O
	Zircon-01	234	161.4	0.689744	0.051	0.0086	0.029	0.0046	0.00441	0.00023	0.0015	0.00015	-0.13155		28.4	1.5	28.9	4.5	130	320	28.4	1.5		1.44981
	Zircon-02	272	166	0.610294	0.0536	0.0081	0.0331	0.0043	0.00456	0.00021	0.0016	0.00017	-0.1018		29.3	1.3	33	4.2	220	280	29.3	1.3		1.63855
	Zircon-03	114.8	58.3	0.50784	0.0475	0.0063	0.108	0.014	0.01686	0.00055	0.00559	0.00053	-0.095545		107.8	3.5	103	12	10	250	107.8	3.5		1.96913
	Zircon-04	360	125.7	0.349167	0.0464	0.0034	0.1104	0.0076	0.01688	0.00041	0.00555	0.0004	-0.089415		107.9	2.6	106.1	6.9	70	150	107.9	2.6		2.86396
	Zircon-05	313	320	1.02236	0.0505	0.014	0.0371	0.011	0.00513	0.00021	0.00174	0.00023	-0.11617		33	1.3	36.8	10	250	360	33	1.3		0.978125
	Zircon-06	229	142	0.620087	0.0485	0.0042	0.1012	0.0081	0.01531	0.00049	0.00518	0.00036	-0.028834		98	3.1	98.6	7.2	150	170	98	3.1		1.61268
	Zircon-07	396	187	0.472222	0.0505	0.0053	0.0342	0.0033	0.00496	0.00017	0.00161	0.00014	0.071762		31.92	1.1	34.1	3.2	200	220	31.92	1.1		2.11765
	Zircon-08	227	86.6	0.381498	0.0503	0.0045	0.1067	0.0091	0.01541	0.00047	0.005	0.00037	-0.069686		98.6	3	102.6	8.3	150	180	98.6	3		2.62125
	Zircon-09	444	234	0.527027	0.0482	0.0043	0.0721	0.0062	0.01082	0.0003	0.00385	0.00028	-0.0027957		69.4	1.9	70.5	5.9	70	180	69.4	1.9		1.89744
	Zircon-10	56.8	39.6	0.697183	0.062	0.051	0.076	0.1	0.00991	0.0014	0.00244	0.0029	0.64378		63.5	8.6	74	64	660	350	63.5	8.6		1.43434
	Zircon-11	754	508	0.67374	0.0476	0.0032	0.083	0.0054	0.01239	0.00031	0.00383	0.00021	0.027071		79.4	1.9	80.8	5.1	110	140	79.4	1.9		1.48425
	Zircon-12	430	163	0.37907	0.0503	0.0038	0.1	0.0071	0.01422	0.00033	0.00445	0.00033	0.16482		91	2.1	96.7	6.6	200	150	91	2.1		2.63804
	Zircon-13	159	89	0.559748	0.0534	0.0078	0.089	0.011	0.01141	0.00037	0.00361	0.00038	-0.090352		73.1	2.4	86	9.8	340	230	73.1	2.4		1.78652
	Zircon-14	586	356	0.607509	0.0505	0.0028	0.1374	0.0071	0.01936	0.00044	0.00594	0.00032	-0.015288		123.6	2.8	131.5	6.3	210	130	123.6	2.8		1.64607
	Zircon-15	412	120.7	0.292961	0.1012	0.0041	4.192	0.16	0.2969	0.0057	0.0833	0.0039	0.68115		1676	28	1673.6	31	1649	75	1649	28		3.41342
	Zircon-16	331	221.4	0.668882	0.048	0.0046	0.0835	0.0075	0.01273	0.00032	0.00401	0.00025	-0.11851		81.5	2	81.2	7.1	60	190	81.5	2		1.49503
	Zircon-17	254.5	137.2	0.539096	0.0501	0.0042	0.1149	0.0085	0.01653	0.00046	0.00506	0.00034	-0.035901		105.7	2.9	110.2	7.8	160	170	105.7	2.9		1.85496
	Zircon-18	546	904	1.65568	0.0477	0.0052	0.0291	0.0029	0.00427	0.00014	0.001262	8e-05	-0.325		27.45	0.88	29.1	2.8	260	210	27.45	0.88		0.603982
	Zircon-19	143.6	108.3	0.754178	0.0871	0.0037	2.923	0.12	0.2388	0.0046	0.0673	0.0032	0.27142		1380	24	1387	31	1376	85	1380	24		1.32595
	Zircon-20	254	157	0.61811	0.0477	0.0046	0.0745	0.0065	0.01132	0.00039	0.00373	0.00029	0.21123		72.6	2.5	72.8	6.1	120	200	72.6	2.5		1.61783
	Zircon-21	282	181.2	0.642553	0.0482	0.0038	0.0959	0.0072	0.01411	0.00042	0.00434	0.00027	-0.21483		90.3	2.6	92.8	6.6	80	160	90.3	2.6		1.55629
	Zircon-22	1585	2730	1.7224	0.0483	0.0025	0.0764	0.0045	0.01126	0.00042	0.003322	0.00018	0.34089		72.2	2.7	74.7	4.3	130	110	72.2	2.7		0.580586
	Zircon-23	258	126.8	0.491473	0.0496	0.0042	0.104	0.009	0.01514	0.00038	0.0048	0.00035	0.2106		96.9	2.4	101.3	8	150	170	96.9	2.4		2.0347
	Zircon-24	203.3	131.5	0.646827	0.0514	0.0054	0.094	0.0094	0.01353	0.00049	0.00436	0.00033	0.10544		86.6	3.1	90.9	8.7	190	210	86.6	3.1		1.54601
	Zircon-25	220	157.1	0.714091	0.052	0.0048	0.094	0.0087	0.01349	0.00041	0.00459	0.00031	0.03625		86.4	2.6	90.8	7.8	290	200	86.4	2.6		1.40038
	Zircon-26	708	52.6	0.0742938	0.0587	0.0027	0.308	0.044	0.03819	0.0043	0.0133	0.0022	0.098789		241.6	26	273	30	540	100	241.6	26		13.4601
	Zircon-27	210	156	0.742857	0.0464	0.0054	0.0796	0.009	0.0122	0.00046	0.00464	0.00041	0.16531		78.2	3	78.5	8.2	40	210	78.2	3		1.34615
	Zircon-28	52.8	13.73	0.260038	0.064	0.011	0.116	0.019	0.01436	0.00067	0.00467	0.00082	0.019807		91.9	4.2	110	17	510	310	91.9	4.2		3.84559
	Zircon-29	212.5	86.4	0.406588	0.0434	0.0041	0.091	0.0084	0.01505	0.00042	0.00504	0.00042	-0.17159		96.3	2.7	88.4	7.9	-140	170	96.3	2.7		2.45949
	Zircon-30	512	297	0.580078	0.0795	0.017	0.323	0.071	0.02996	0.00075	0.013	0.0023	-0.0080527		190.3	4.7	283	46	1140	230	190.3	4.7		1.72391
	Zircon-31	898	258	0.287305	0.0479	0.0031	0.076	0.0046	0.01154	0.00029	0.0038	0.00021	0.11469		74	1.9	74.3	4.4	90	140	74	1.9		3.48062
	Zircon-32	339	207	0.610619	0.057	0.011	0.08	0.016	0.01011	0.00062	0.00329	0.00047	0.058833		64.8	4	80	14	340	330	64.8	4		1.63768
	Zircon-33	54.6	16.73	0.30641	0.0509	0.0079	0.112	0.016	0.01647	0.00083	0.00607	0.00088	0.19538		105.3	5.3	106	15	250	260	105.3	5.3		3.2636
	Zircon-34	127.8	52.5	0.410798	0.0459	0.0062	0.106	0.013	0.01683	0.00054	0.0052	0.00058	-0.1565		107.6	3.4	102	12	-20	250	107.6	3.4		2.43429
	Zircon-35	569	178	0.31283	0.0465	0.0031	0.0919	0.006	0.01452	0.00034	0.00438	0.00032	0.068666		93.2	2.2	89.1	5.4	30	140	93.2	2.2		3.19663
	Zircon-36	575	398	0.692174	0.0471	0.0038	0.0771	0.0054	0.0118	0.00032	0.00387	0.00022	-0.026976		75.6	2	75.9	5.2	50	160	75.6	2		1.44472
	Zircon-37	237.4	126.3	0.532013	0.0509	0.0046	0.1	0.008	0.0142	0.00044	0.00457	0.00035	0.10339		90.9	2.8	96.5	7.4	240	180	90.9	2.8		1.87965
	Zircon-38	203.9	107.5	0.527219	0.0548	0.0053	0.111	0.011	0.01487	0.00047	0.0054	0.00042	-0.087665		95.1	3	107	10	390	200	95.1	3		1.89674
	Zircon-39	391	131.8	0.337084	0.0488	0.0038	0.0944	0.0066	0.01427	0.00037	0.00469	0.00033	-0.26612		91.3	2.3	92.2	5.9	120	150	91.3	2.3		2.96662
	Zircon-40	446	312	0.699552	0.0533	0.0062	0.0362	0.004	0.00503	0.00016	0.00168	0.00018	0.073488		32.3	1	37.2	4	330	220	32.3	1		1.42949
	Zircon-41	838	554	0.661098	0.049	0.0025	0.0958	0.0047	0.01415	0.00033	0.00457	0.00024	0.38282		90.6	2.1	92.9	4.4	136	110	90.6	2.1		1.51264
	Zircon-42	488	127	0.260246	0.0624	0.0092	0.116	0.021	0.01357	0.00042	0.00647	0.0015	0.13343		86.9	2.7	111	18	720	220	86.9	2.7		3.84252
	Zircon-43	265.3	191.9	0.723332	0.0454	0.0037	0.0905	0.0068	0.01412	0.00042	0.00437	0.00031	0.28475		90.4	2.7	87.6	6.4	30	160	90.4	2.7		1.38249
	Zircon-44	287.1	142.9	0.497736	0.0485	0.0045	0.0919	0.008	0.01412	0.00043	0.00448	0.00033	0.056832		90.4	2.7	90	7.6	80	190	90.4	2.7		2.0091
	Zircon-45	178.1	144.2	0.809657	0.0522	0.006	0.0786	0.0083	0.01137	0.0004	0.00378	0.00028	-0.21289		72.9	2.6	76.5	7.8	210	230	72.9	2.6		1.23509
	Zircon-46	188.2	125.8	0.668438	0.054	0.0071	0.082	0.011	0.01106	0.00047	0.00411	0.00034	0.030388		70.9	3	80	11	200	250	70.9	3		1.49603
	Zircon-47	414	225	0.543478	0.0469	0.0032	0.1007	0.0065	0.01539	0.00042	0.00495	0.00032	0.1185		98.5	2.7	97.2	6	70	150	98.5	2.7		1.84
	Zircon-48	201.6	184.9	0.917163	0.048	0.0043	0.0751	0.0066	0.01124	0.00036	0.00367	0.00025	0.36456		72	2.3	73.4	6.2	90	180	72	2.3		1.09032
	Zircon-49	355	145	0.408451	0.048	0.0031	0.0976	0.0062	0.01478	0.00039	0.0048	0.00039	0.22573		94.6	2.5	94.5	5.8	100	140	94.6	2.5		2.44828
	Zircon-50	205.9	72.3	0.351141	0.0796	0.0034	2.262	0.096	0.2052	0.0042	0.0607	0.0031	0.37335		1205	22	1199	30	1185	83	1205	22		2.84786
	Zircon-51	138.3	48.4	0.349964	0.0444	0.0063	0.0699	0.0098	0.01125	0.00046	0.00421	0.00045	0.0060951		72.1	2.9	68.1	9.2	-60	270	72.1	2.9		2.85744
	Zircon-52	823	162	0.196841	0.047	0.0034	0.0738	0.005	0.01145	0.0003	0.00354	0.00027	0.02986		73.4	1.9	72.2	4.7	30	140	73.4	1.9		5.08025
	Zircon-53	463	254.8	0.550324	0.0485	0.0032	0.0781	0.0047	0.01162	0.0003	0.00378	0.00024	0.033328		74.5	1.9	76.3	4.4	130	130	74.5	1.9		1.81711
	Zircon-54	100.9	88.7	0.879088	0.0483	0.0077	0.082	0.012	0.01152	0.00054	0.00359	0.00033	-0.053212		73.8	3.5	79	11	170	270	73.8	3.5		1.13754
	Zircon-55	363	149.8	0.412672	0.0492	0.003	0.1053	0.0063	0.01547	0.0004	0.00518	0.00032	0.28469		99	2.5	101.5	5.8	170	140	99	2.5		2.42323
	Zircon-56	514	248	0.48249	0.0486	0.0033	0.1062	0.0068	0.0159	0.00043	0.00489	0.0003	0.0060157		101.7	2.8	103.2	6	140	150	101.7	2.8		2.07258
	Zircon-57	556	250	0.44964	0.0468	0.0038	0.0574	0.0047	0.00864	0.00024	0.0028	0.00019	0.088098		55.4	1.6	56.6	4.5	50	170	55.4	1.6		2.224
	Zircon-58	161.6	87.9	0.543936	0.0546	0.0052	0.0823	0.007	0.01123	0.00036	0.00347	0.00035	0.15352		72	2.3	81	6.6	300	200	72	2.3		1.83845
	Zircon-59	610	10.32	0.016918	0.08	0.0035	1.306	0.091	0.1194	0.0055	0.0173	0.0022	0.2378		727	31	848	35	1193	84	727	31		59.1085
	Zircon-60	274.1	54	0.197008	0.0505	0.0055	0.0962	0.01	0.01379	0.00045	0.00546	0.0007	-0.061766		88.3	2.8	92.8	9.4	170	220	88.3	2.8		5.07593
	Zircon-61	210	117.1	0.557619	0.0485	0.0056	0.0878	0.0096	0.01347	0.00042	0.0043	0.00036	0.17094		86.3	2.7	86.3	9.2	100	220	86.3	2.7		1.79334
	Zircon-62	505	220	0.435644	0.0488	0.0038	0.1009	0.0077	0.01481	0.00038	0.0048	0.00035	0.0069705		94.8	2.4	98.4	7.3	190	170	94.8	2.4		2.29545
	Zircon-63	186	57.6	0.309677	0.0452	0.0044	0.0963	0.0095	0.01516	0.00056	0.00527	0.00049	0.1249		97	3.6	92.9	8.8	30	190	97	3.6		3.22917
	Zircon-64	264.6	62.2	0.235072	0.0516	0.0041	0.0929	0.0072	0.01331	0.00039	0.00477	0.00043	0.15511		85.2	2.5	89.9	6.7	210	170	85.2	2.5		4.25402
	Zircon-65	574	170	0.296167	0.1051	0.0042	4.39	0.17	0.3039	0.0062	0.0899	0.0044	0.76082		1713	31	1710	32	1715	75	1715	31		3.37647
	Zircon-66	326	232	0.711656	0.0506	0.028	0.0783	0.074	0.01149	0.00077	0.00369	0.0023	0.14186		73.7	4.9	76.2	53	180	440	73.7	4.9		1.40517
	Zircon-67	430	230	0.534884	0.082	0.025	0.276	0.15	0.02385	0.0018	0.0122	0.007	0.13773		151.9	11	250	79	1190	280	151.9	11		1.86957
	Zircon-68	153.4	123.1	0.802477	0.066	0.014	0.0424	0.0088	0.00516	0.00033	0.00196	0.00027	0.15771		33.2	2.1	41.9	8.4	670	370	33.2	2.1		1.24614
	Zircon-69	491	192	0.391039	0.0488	0.0035	0.094	0.0068	0.01387	0.00037	0.00486	0.00033	0.081786		88.8	2.4	91	6.2	150	160	88.8	2.4		2.55729
	Zircon-70	194.7	84.7	0.435028	0.0493	0.0054	0.0782	0.0081	0.01139	0.00043	0.00383	0.00038	0.02628		73	2.7	77.1	7.4	230	210	73	2.7		2.2987
	Zircon-71	313	136	0.434505	0.0494	0.0038	0.1359	0.0097	0.02002	0.00051	0.0063	0.00043	0.060319		127.8	3.2	129	8.7	200	160	127.8	3.2		2.30147
	Zircon-72	812	602	0.741379	0.139	0.044	0.28	0.24	0.01472	0.0022	0.0093	0.0061	0.64734		94.2	14	249	120	2160	260	94.2	14		1.34884
	Zircon-73	190.7	63	0.330362	0.0525	0.0064	0.098	0.012	0.0136	0.00049	0.00454	0.00045	0.044676		87.1	3.1	94	11	250	250	87.1	3.1		3.02698
	Zircon-74	733	347	0.473397	0.0593	0.0049	0.0788	0.0071	0.01016	0.00042	0.00383	0.00034	0.046472		65.2	2.7	76.8	6.7	520	180	65.2	2.7		2.11239
	Zircon-75	280	156.8	0.56	0.0463	0.0039	0.0875	0.0071	0.01383	0.00045	0.00475	0.00034	-0.18379		88.6	2.9	84.9	6.6	20	170	88.6	2.9		1.78571
	Zircon-76	276.9	110	0.397255	0.0499	0.0054	0.0877	0.008	0.01287	0.00039	0.00443	0.00036	-0.17597		82.5	2.5	85	7.4	170	210	82.5	2.5		2.51727
	Zircon-77	241	144.3	0.598755	0.0515	0.018	0.0359	0.012	0.00515	0.00024	0.00182	0.00033	-0.15866		33.1	1.5	35.6	11	250	400	33.1	1.5		1.67013
	Zircon-78	854	203.9	0.238759	0.0484	0.0034	0.0656	0.0045	0.00996	0.00024	0.00342	0.00025	-0.00048707		63.9	1.6	64.5	4.3	110	150	63.9	1.6		4.18833
	Zircon-79	306	125.4	0.409804	0.0474	0.0035	0.0827	0.0056	0.01302	0.00036	0.0046	0.00034	-0.23288		83.4	2.3	80.4	5.3	20	160	83.4	2.3		2.44019
	Zircon-80	1150	831	0.722609	0.0473	0.003	0.0735	0.0043	0.01143	0.00027	0.00351	0.0002	-0.075048		73.3	1.7	72	4	50	130	73.3	1.7		1.38387
	Zircon-81	193	161	0.834197	0.09	0.0039	2.883	0.12	0.237	0.0048	0.0697	0.0034	0.18602		1371	25	1376	32	1424	85	1371	25		1.19876
	Zircon-82	615	239	0.388618	0.0486	0.0033	0.1043	0.0068	0.01562	0.0004	0.00489	0.00031	0.060555		99.9	2.5	100.6	6.3	140	150	99.9	2.5		2.57322
	Zircon-83	222.9	105.8	0.474652	0.0987	0.0041	3.825	0.17	0.283	0.0074	0.0827	0.0038	0.63062		1606	38	1600	37	1598	79	1598	38		2.10681
	Zircon-84	257	118.8	0.462257	0.0493	0.0041	0.0942	0.0079	0.01389	0.00054	0.00486	0.00035	0.30966		88.9	3.4	91.1	7.3	120	170	88.9	3.4		2.1633
	Zircon-85	211.7	34.8	0.164384	0.0698	0.0038	1.077	0.11	0.1125	0.007	0.0513	0.0027	0.59481		687	39	740	45	910	100	687	39		6.08333
	Zircon-86	93.3	45.6	0.488746	0.073	0.016	0.164	0.038	0.01693	0.00074	0.0084	0.0013	-0.28572		108.2	4.7	151	31	780	350	108.2	4.7		2.04605
	Zircon-87	319	232	0.727273	0.08	0.028	0.136	0.069	0.01247	0.00065	0.00562	0.0016	0.00059975		79.9	4.1	127	50	980	370	79.9	4.1		1.375
	Zircon-88	262	39.9	0.15229	0.0498	0.0051	0.0971	0.0099	0.01439	0.00047	0.00564	0.00059	-0.042406		92.1	3	93.6	9.2	150	200	92.1	3		6.56642
	Zircon-89	147	154	1.04762	0.062	0.0085	0.201	0.028	0.02464	0.00086	0.00786	0.00064	-0.078876		157.6	5.4	186	23	570	270	157.6	5.4		0.954545
	Zircon-91	300	85.8	0.286	0.049	0.0034	0.1499	0.0097	0.02259	0.0006	0.00798	0.00051	0.12847		144	3.8	141.5	8.6	120	150	144	3.8		3.4965
	Zircon-92	98.7	41.4	0.419453	0.197	0.046	0.52	0.33	0.0184	0.0028	0.0209	0.017	0.36966		117.7	17	411	120	2790	200	2790	17		2.38406
	Zircon-93	545	117.8	0.216147	0.0511	0.0034	0.105	0.0068	0.01511	0.00038	0.00496	0.00036	-0.20021		96.7	2.4	101.2	6.2	270	140	96.7	2.4		4.62649
	Zircon-94	912	176	0.192982	0.0497	0.0027	0.0993	0.0052	0.01477	0.00033	0.00505	0.00037	0.23424		94.5	2.1	96.1	4.8	192	120	94.5	2.1		5.18182
	Zircon-95	2150	1050	0.488372	0.0492	0.0026	0.0758	0.0038	0.01136	0.00023	0.00376	0.00018	-0.11406		72.81	1.5	74.2	3.4	152	110	72.81	1.5		2.04762
	Zircon-96	1860	1190	0.639785	0.0482	0.0066	0.0741	0.021	0.01132	0.00036	0.00369	0.00048	0.57914		72.6	2.3	72.6	9.7	104	160	72.6	2.3		1.56303
	Zircon-97	421	179.1	0.425416	0.0498	0.0038	0.1072	0.0075	0.0156	0.00043	0.00535	0.00037	0.2665		99.8	2.8	103.2	6.9	210	150	99.8	2.8		2.35064
	Zircon-98	833	813	0.97599	0.0514	0.0038	0.0973	0.0076	0.014	0.00036	0.00445	0.0003	0.27867		89.6	2.3	94.2	6.7	230	150	89.6	2.3		1.0246
	Zircon-99	434	240	0.552995	0.0495	0.0041	0.0884	0.014	0.0134	0.0011	0.00436	0.0003	0.16917		85.8	6.8	87	13	170	170	85.8	6.8		1.80833
	Zircon-100	447	23.2	0.0519016	0.0542	0.0037	0.221	0.089	0.0296	0.0078	0.0277	0.0035	0.63919		188	47	206	54	390	130	188	47		19.2672
	Zircon-101	141.6	41.6	0.293785	0.0506	0.0066	0.102	0.014	0.01492	0.00052	0.00522	0.00053	0.24305		95.5	3.3	98	13	240	250	95.5	3.3		3.40385
	Zircon-102	1158	517	0.446459	0.0484	0.0026	0.0929	0.0048	0.01425	0.00029	0.00448	0.00024	0.24444		91.21	1.8	90.1	4.5	108	120	91.21	1.8		2.23985
	Zircon-103	216.9	50.1	0.230982	0.0488	0.004	0.088	0.0069	0.01336	0.00044	0.00447	0.00055	0.091563		85.6	2.8	85.5	6.5	150	170	85.6	2.8		4.32934
	Zircon-104	82.5	27.3	0.330909	0.0524	0.0081	0.101	0.014	0.01533	0.00068	0.00502	0.00069	-0.055308		98.1	4.3	97	13	150	300	98.1	4.3		3.02198
	Zircon-105	72.3	67.8	0.937759	0.0873	0.0046	2.94	0.15	0.244	0.0055	0.0705	0.0035	0.14644		1407	28	1392	40	1368	110	1407	28		1.06637
	Sample: Yaq-11-17 mediun to carse-grained sandstone, 27°53´34.04"N and 112°24´55.32"O
	Zircon-01	72.2	36.9	0.51108	0.0445	0.0072	0.104	0.016	0.01661	0.00079	0.00567	0.00085	-0.14646		106.1	5	100	14	-70	290	106.1	5		1.95664
	Zircon-02	292	136.9	0.468836	0.0475	0.0044	0.1341	0.012	0.0203	0.00056	0.00635	0.00067	0.057755		129.5	3.5	127.2	11	90	200	129.5	3.5		2.13294
	Zircon-03	5410	333	0.0615527	0.0898	0.0054	0.1251	0.0079	0.01027	0.00061	0.023	0.0011	0.60899		65.8	3.9	119.7	7.2	1416	180	65.8	3.9		16.2462
	Zircon-04	215	134	0.623256	0.057	0.006	0.112	0.012	0.01412	0.00045	0.00527	0.00055	0.29789		90.4	2.9	107	11	400	210	90.4	2.9		1.60448
	Zircon-05	188	153.4	0.815957	0.0545	0.0046	0.198	0.016	0.02637	0.00072	0.00986	0.00097	0.065644		167.8	4.5	183	13	340	180	167.8	4.5		1.22555
	Zircon-06	137.1	117	0.853392	0.1017	0.0065	4.058	0.24	0.2895	0.0067	0.0819	0.008	0.15553		1639	33	1645	48	1653	120	1653	33		1.17179
	Zircon-07	187	96	0.513369	0.0483	0.0066	0.0787	0.01	0.01196	0.00046	0.0044	0.00055	0.059279		76.6	2.9	78.1	9.4	140	240	76.6	2.9		1.94792
	Zircon-08	200	149	0.745	0.07	0.011	0.043	0.0076	0.00523	0.00023	0.00202	0.00028	0.38195		33.6	1.5	42	7.3	530	280	33.6	1.5		1.34228
	Zircon-09	403	254	0.630273	0.0475	0.0041	0.0993	0.0081	0.01486	0.00041	0.00493	0.0005	0.0046812		95.1	2.6	95.9	7.7	110	180	95.1	2.6		1.58661
	Zircon-10	157.2	158	1.00509	0.0562	0.007	0.102	0.012	0.01326	0.00048	0.00413	0.00045	0.22195		84.9	3.1	98	11	350	260	84.9	3.1		0.994937
	Zircon-11	209	67.9	0.32488	0.0531	0.0064	0.095	0.011	0.01272	0.00052	0.0046	0.00061	-0.25499		81.4	3.3	91	10	360	250	81.4	3.3		3.07806
	Zircon-12	193	55.8	0.289119	0.0499	0.0059	0.098	0.011	0.0141	0.00044	0.00522	0.00064	0.18812		90.2	2.8	96	10	200	230	90.2	2.8		3.45878
	Zircon-13	89.1	55.3	0.620651	0.0551	0.0098	0.133	0.021	0.01759	0.00079	0.00604	0.00086	-0.13685		112.4	5	126	18	320	330	112.4	5		1.61121
	Zircon-14	222	138	0.621622	0.07	0.013	0.0486	0.01	0.00551	0.00029	0.00235	0.00041	0.10008		35.4	1.9	47.9	9.5	640	360	35.4	1.9		1.6087
	Zircon-15	243	109	0.44856	0.0602	0.0062	0.124	0.012	0.01501	0.00048	0.00549	0.00065	-0.019082		96	3	118	11	510	210	96	3		2.22936
	Zircon-16	99	53.6	0.541414	0.051	0.0088	0.071	0.012	0.01014	0.0005	0.00324	0.00049	0.056861		65	3.2	68	11	220	320	65	3.2		1.84701
	Zircon-17	89.5	38.2	0.426816	0.0584	0.011	0.086	0.017	0.01075	0.00052	0.00469	0.001	0.082935		68.9	3.3	85	16	420	320	68.9	3.3		2.34293
	Zircon-18	145	79.2	0.546207	0.0536	0.0073	0.079	0.011	0.01148	0.00038	0.00411	0.00054	-0.0062919		73.6	2.4	76.9	10	290	260	73.6	2.4		1.83081
	Zircon-19	315	158	0.501587	0.088	0.016	0.131	0.025	0.01072	0.00048	0.00468	0.0007	0.51014		68.7	3	124	21	1350	230	68.7	3		1.99367
	Zircon-20	495	155	0.313131	0.0524	0.0053	0.0779	0.0067	0.01104	0.00042	0.00401	0.00043	0.027238		70.8	2.7	78.4	6.4	270	210	70.8	2.7		3.19355
	Zircon-21	99.2	28.7	0.289315	0.0459	0.0066	0.15	0.018	0.02365	0.001	0.00765	0.001	-0.16423		150.7	6.3	140	16	-40	260	150.7	6.3		3.45645
	Zircon-22	139.9	35.9	0.256612	0.047	0.0058	0.1	0.012	0.01512	0.00062	0.00526	0.00072	-0.033335		96.7	4	96	11	90	240	96.7	4		3.89694
	Zircon-23	453	395	0.871965	0.0469	0.0056	0.0335	0.0039	0.00517	0.00019	0.00165	0.00019	0.082237		33.3	1.2	33.4	3.8	60	230	33.3	1.2		1.14684
	Zircon-24	172.8	125.5	0.726273	0.051	0.007	0.0676	0.0091	0.00951	0.00043	0.00328	0.00041	-0.074047		61	2.8	66	8.6	250	280	61	2.8		1.37689
	Zircon-25	255	94	0.368627	0.0465	0.0043	0.0963	0.0091	0.01477	0.00052	0.00469	0.0006	0.21358		94.5	3.3	93	8.4	10	180	94.5	3.3		2.71277
	Zircon-26	116.2	72.8	0.626506	0.0516	0.006	0.115	0.012	0.01679	0.00062	0.00504	0.00066	-0.043372		107.3	3.9	111.3	11	200	230	107.3	3.9		1.59615
	Zircon-27	133.5	88.2	0.660674	0.0478	0.0064	0.092	0.012	0.01408	0.00054	0.00423	0.00052	0.065452		90.1	3.4	88	11	40	260	90.1	3.4		1.51361
	Zircon-28	323	268	0.829721	0.0477	0.0049	0.0783	0.0078	0.01164	0.00038	0.0038	0.00042	0.17691		74.6	2.4	76.3	7.3	160	200	74.6	2.4		1.20522
	Zircon-29	152.1	107	0.703485	0.0492	0.0075	0.0769	0.011	0.01131	0.0004	0.00338	0.00043	0.015673		72.5	2.6	74.7	9.9	140	280	72.5	2.6		1.4215
	Zircon-30	232	196	0.844828	0.0483	0.006	0.0689	0.008	0.01015	0.00037	0.00316	0.00037	-0.22907		65.1	2.3	67.4	7.5	90	230	65.1	2.3		1.18367
	Zircon-31	311	115.3	0.37074	0.0476	0.0043	0.1013	0.0083	0.01541	0.00048	0.00504	0.00059	0.0057077		98.6	3.1	97.8	7.7	80	190	98.6	3.1		2.69731
	Zircon-32	33.1	43.7	1.32024	0.078	0.012	0.254	0.033	0.0244	0.0014	0.00838	0.0011	-0.30328		155.5	8.9	230	27	900	340	155.5	8.9		0.757437
	Zircon-33	270	289	1.07037	0.068	0.031	0.103	0.091	0.01062	0.0011	0.00424	0.0014	0.40483		68.1	7.2	99	64	670	310	68.1	7.2		0.934256
	Zircon-34	93.4	82.5	0.883298	0.064	0.01	0.091	0.017	0.01076	0.00051	0.00398	0.00047	0.32002		69	3.2	90	15	460	340	69	3.2		1.13212
	Zircon-35	332	241	0.725904	0.0482	0.0046	0.0905	0.0084	0.01328	0.00042	0.00404	0.00044	0.11058		85.1	2.7	87.7	7.9	150	190	85.1	2.7		1.37759
	Zircon-36	354	194	0.548023	0.0495	0.0053	0.0774	0.0075	0.01178	0.00039	0.0038	0.00042	-0.07475		75.5	2.5	75.5	7.1	120	220	75.5	2.5		1.82474
	Zircon-37	311	148.3	0.476849	0.0507	0.0046	0.0994	0.008	0.01428	0.00044	0.00461	0.00051	-0.12382		91.4	2.8	96.9	7.7	210	180	91.4	2.8		2.0971
	Zircon-38	240	81.5	0.339583	0.0504	0.005	0.1125	0.011	0.01602	0.0005	0.00486	0.0006	0.078898		102.4	3.2	107.8	9.7	180	210	102.4	3.2		2.94479
	Zircon-39	92.4	66.9	0.724026	0.049	0.0073	0.095	0.013	0.01452	0.00062	0.00479	0.00061	0.026419		92.9	4	93	13	70	290	92.9	4		1.38117
	Zircon-40	145	61.7	0.425517	0.0526	0.007	0.113	0.014	0.01597	0.00067	0.00487	0.00062	-0.10683		102.1	4.2	110	13	280	280	102.1	4.2		2.35008
	Zircon-41	376	140	0.37234	0.0493	0.0045	0.1007	0.0087	0.01474	0.00045	0.00451	0.00051	0.011313		94.3	2.8	98	7.8	190	180	94.3	2.8		2.68571
	Zircon-42	286	160	0.559441	0.096	0.014	0.168	0.024	0.01202	0.00045	0.00692	0.00096	0.033899		77	2.9	156	21	1440	260	77	2.9		1.7875
	Zircon-43	332	222	0.668675	0.0481	0.014	0.0373	0.011	0.00507	0.00029	0.00169	0.00032	0.11308		32.6	1.8	37	11	230	340	32.6	1.8		1.4955
	Zircon-44	81.1	53.4	0.658446	0.0489	0.0076	0.106	0.016	0.01576	0.00075	0.00544	0.00064	0.17385		100.8	4.8	101	15	90	280	100.8	4.8		1.51873
	Zircon-45	149	145	0.973154	0.0567	0.009	0.075	0.011	0.01015	0.00048	0.00342	0.00042	-0.00053244		65.1	3.1	73	11	360	300	65.1	3.1		1.02759
	Zircon-46	378	370	0.978836	0.0472	0.0044	0.0711	0.007	0.01094	0.00035	0.00346	0.00036	0.32103		70.2	2.2	70.2	6.7	100	190	70.2	2.2		1.02162
	Zircon-47	86.6	57.2	0.660508	0.053	0.015	0.075	0.03	0.0099	0.00071	0.00481	0.00088	0.15933		63.3	4.5	72	26	210	310	63.3	4.5		1.51399
	Zircon-48	390	293	0.751282	0.0486	0.004	0.1452	0.011	0.0213	0.00055	0.00645	0.00068	-0.070258		135.9	3.5	137.3	10	120	180	135.9	3.5		1.33106
	Zircon-49	919	302	0.328618	0.0481	0.0036	0.0766	0.0051	0.01167	0.00031	0.00363	0.00038	-0.05732		74.8	2	74.9	4.8	92	160	74.8	2		3.04305
	Zircon-50	215	93.3	0.433953	0.047	0.0042	0.1395	0.012	0.02109	0.00075	0.00671	0.00075	0.059537		134.5	4.8	132.3	11	70	180	134.5	4.8		2.30439
	Zircon-51	395	202	0.511392	0.049	0.0041	0.1102	0.009	0.01597	0.00047	0.00522	0.0006	0.38376		102.2	3	105.9	8.2	190	170	102.2	3		1.95545
	Zircon-52	371	419	1.12938	0.0486	0.0047	0.102	0.013	0.01536	0.0012	0.00391	0.00072	-0.1241		98.3	7.4	98.4	12	100	210	98.3	7.4		0.885442
	Zircon-53	269	159	0.591078	0.0523	0.006	0.092	0.011	0.01328	0.00044	0.0043	0.00058	0.038103		85	2.8	89.4	10	260	210	85	2.8		1.69182
	Zircon-54	282	140.8	0.499291	0.0469	0.0043	0.1127	0.0099	0.0175	0.00052	0.00545	0.0006	0.13124		111.9	3.3	108.1	9	30	190	111.9	3.3		2.00284
	Zircon-55	519	272	0.524085	0.0485	0.0041	0.079	0.0071	0.01153	0.00035	0.00372	0.00041	0.10118		73.9	2.3	77.9	6.6	170	180	73.9	2.3		1.90809
	Zircon-56	227	103.7	0.456828	0.0484	0.0048	0.0944	0.0088	0.01391	0.00043	0.005	0.00058	0.010957		89.1	2.7	91.3	8.1	100	190	89.1	2.7		2.18901
	Zircon-57	236	104	0.440678	0.0493	0.005	0.0741	0.0067	0.01117	0.00041	0.00405	0.0005	0.067157		71.6	2.6	73.3	6	160	190	71.6	2.6		2.26923
	Zircon-58	243	339	1.39506	0.07	0.01	0.0343	0.0054	0.00382	0.00016	0.00135	0.00016	-0.26613		24.5	1	34.2	5.2	820	280	24.5	1		0.716814
	Zircon-59	254	174.4	0.686614	0.0493	0.006	0.0604	0.0071	0.00879	0.00031	0.0031	0.00034	0.12479		56.4	2	59.4	6.7	180	230	56.4	2		1.45642
	Zircon-60	611	196	0.320786	0.05	0.0041	0.08	0.0061	0.01177	0.00032	0.00382	0.00046	0.082374		75.4	2	78	5.7	160	170	75.4	2		3.11735
	Zircon-61	370	314	0.848649	0.049	0.0047	0.0864	0.0083	0.01279	0.00043	0.0043	0.00045	0.1851		81.9	2.8	83.9	7.4	130	190	81.9	2.8		1.17834
	Zircon-62	394	125	0.317259	0.0489	0.0041	0.1095	0.009	0.01634	0.0005	0.00582	0.0007	0.013743		104.5	3.2	105.3	8.2	140	170	104.5	3.2		3.152
	Zircon-63	1150	660	0.573913	0.0471	0.0035	0.0961	0.0068	0.01456	0.00053	0.00536	0.00085	0.23672		93.2	3.3	93.1	6.2	54	150	93.2	3.3		1.74242
	Zircon-64	408	206.3	0.505637	0.0498	0.0049	0.0884	0.0081	0.01289	0.00042	0.00438	0.00046	-0.013455		82.5	2.7	85.8	7.6	180	210	82.5	2.7		1.9777
	Zircon-65	123	80.9	0.657724	0.051	0.0049	0.189	0.016	0.02774	0.00097	0.00916	0.001	-0.0046204		176.4	6.1	175	14	250	200	176.4	6.1		1.5204
	Zircon-66	157.1	63.5	0.404201	0.0457	0.0067	0.094	0.013	0.01498	0.00061	0.00469	0.00063	0.053986		95.8	3.9	91	12	20	280	95.8	3.9		2.47402
	Zircon-67	422	98.9	0.23436	0.0562	0.0063	0.109	0.013	0.01419	0.00046	0.00547	0.0012	0.26282		90.8	2.9	104	12	470	210	90.8	2.9		4.26694
	Zircon-68	49.2	19	0.386179	0.085	0.0077	0.84	0.15	0.0698	0.014	0.047	0.0058	0.79606		435	78	613	66	1270	190	435	78		2.58947
	Zircon-69	353	17	0.0481586	0.0516	0.0037	0.318	0.022	0.04429	0.0013	0.0168	0.0026	0.079683		279.4	7.8	280.1	17	244	160	279.4	7.8		20.7647
	Zircon-70	179	16.6	0.0927374	0.0993	0.017	0.209	0.035	0.0144	0.00059	0.0286	0.0054	0.24183		92.2	3.8	191	29	1710	230	92.2	3.8		10.7831
	Zircon-71	483	238	0.492754	0.0464	0.004	0.0855	0.007	0.01336	0.0004	0.00422	0.00049	0.07226		85.5	2.5	83.2	6.6	10	180	85.5	2.5		2.02941
	Zircon-72	251	58.5	0.233068	0.0574	0.0058	0.1178	0.012	0.01519	0.00055	0.00632	0.00092	0.047684		97.2	3.5	112.7	10	450	210	97.2	3.5		4.2906
	Zircon-73	228	90.2	0.395614	0.0566	0.0069	0.109	0.013	0.01427	0.00053	0.00487	0.00072	0.17964		91.4	3.4	107	12	440	230	91.4	3.4		2.52772
	Zircon-74	312	276	0.884615	0.0513	0.0058	0.111	0.012	0.01594	0.00059	0.00451	0.00059	-0.17353		101.9	3.7	106.6	11	220	220	101.9	3.7		1.13043
	Zircon-75	158.4	84	0.530303	0.0453	0.0057	0.074	0.011	0.01193	0.00053	0.00364	0.00044	0.42033		76.5	3.4	71	10	-130	240	76.5	3.4		1.88571
	Zircon-76	751	678	0.902796	0.0494	0.0034	0.1654	0.011	0.02458	0.00065	0.00765	0.00075	0.50238		156.5	4.1	155.3	9.6	165	150	156.5	4.1		1.10767
	Zircon-77	183.9	176.6	0.960305	0.074	0.005	1.77	0.11	0.1754	0.0043	0.0525	0.0051	0.20898		1043	24	1038	42	1037	130	1043	24		1.04134
	Zircon-78	132	75	0.568182	0.057	0.016	0.082	0.026	0.01079	0.00061	0.00345	0.0012	0.060492		69.2	3.9	79	22	300	340	69.2	3.9		1.76
	Zircon-79	29.2	13.16	0.450685	0.05	0.013	0.12	0.028	0.0174	0.0013	0.0054	0.0011	-0.027441		111.2	8	111	25	-40	430	111.2	8		2.21884
	Zircon-80	950	479	0.504211	0.0502	0.0038	0.1037	0.0074	0.0151	0.00038	0.00478	0.00047	-0.047019		96.6	2.4	100.1	6.8	210	170	96.6	2.4		1.9833
	Zircon-81	144.7	33.8	0.233587	0.0478	0.006	0.108	0.013	0.01656	0.0006	0.00477	0.00087	-0.2689		105.9	3.8	105	12	50	250	105.9	3.8		4.28107
	Zircon-82	735	930	1.26531	0.0489	0.0039	0.1802	0.013	0.02677	0.00069	0.00851	0.00084	0.0096124		170.3	4.3	168	11	120	170	170.3	4.3		0.790323
	Zircon-83	333	99.7	0.299399	0.0481	0.0048	0.1078	0.01	0.01596	0.00052	0.00497	0.00063	0.19946		102.1	3.3	104.6	9.5	110	200	102.1	3.3		3.34002
	Zircon-84	170	82.3	0.484118	0.0894	0.021	0.152	0.048	0.01205	0.00075	0.00519	0.003	0.19097		77.2	4.8	143	38	1410	250	77.2	4.8		2.06561
	Zircon-85	163.4	118.3	0.72399	0.0464	0.011	0.074	0.013	0.01121	0.00052	0.00305	0.00047	-0.16911		71.9	3.3	66	18	-110	430	71.9	3.3		1.38123
	Zircon-86	170.4	53.9	0.316315	0.0479	0.0056	0.096	0.011	0.01468	0.00055	0.00448	0.00056	-0.01034		94	3.5	92.6	10	40	230	94	3.5		3.16141
	Zircon-87	281	131.5	0.467972	0.045	0.0043	0.0924	0.0083	0.01476	0.00049	0.00487	0.00053	-0.033594		94.5	3.1	89.5	7.7	-50	180	94.5	3.1		2.13688
	Zircon-88	97.3	65	0.668037	0.0479	0.0083	0.075	0.014	0.01199	0.00064	0.00371	0.00049	0.17177		76.8	4.1	70	12	-50	300	76.8	4.1		1.49692
	Zircon-89	220	129.7	0.589545	0.0463	0.0061	0.0687	0.0087	0.01112	0.00043	0.00354	0.00043	0.051256		71.3	2.8	67.1	8.3	0	260	71.3	2.8		1.69622
	Zircon-90	306	96.5	0.315359	0.0462	0.0047	0.0984	0.0093	0.01538	0.0005	0.00507	0.00061	0.0016436		98.4	3.2	95	8.6	10	200	98.4	3.2		3.17098
	Zircon-91	1211	930	0.76796	0.0479	0.0049	0.0324	0.0031	0.00496	0.00015	0.001631	0.00017	0.20988		31.88	0.97	32.3	3.1	60	200	31.88	0.97		1.30215
	Zircon-92	33.8	15.44	0.456805	0.057	0.015	0.135	0.034	0.0167	0.0012	0.0046	0.0013	-0.094023		107	7.8	123	29	120	420	107	7.8		2.18912
	Zircon-93	37	17.6	0.475676	0.041	0.012	0.095	0.027	0.017	0.0011	0.0056	0.0013	-0.52568		108.6	7.2	72	43	-320	470	108.6	7.2		2.10227
	Zircon-94	113.5	31.5	0.277533	0.0484	0.0082	0.097	0.017	0.01491	0.00072	0.00473	0.00098	-0.0012514		95.4	4.6	93	16	40	330	95.4	4.6		3.60317
	Zircon-95	309	67.5	0.218447	0.0494	0.0045	0.178	0.016	0.02688	0.00078	0.00852	0.001	-0.062896		171	4.9	165	14	160	170	171	4.9		4.57778
	Zircon-96	645	299	0.463566	0.0478	0.0033	0.147	0.0096	0.02238	0.00054	0.00712	0.00074	0.13371		142.7	3.4	139.1	8.5	108	150	142.7	3.4		2.15719
	Zircon-97	151.4	60.9	0.402246	0.0487	0.0048	0.1095	0.0096	0.01673	0.0007	0.0052	0.00066	-0.12604		106.9	4.5	105.2	8.8	140	210	106.9	4.5		2.48604
	Zircon-98	554	437	0.788809	0.0461	0.0041	0.0825	0.0068	0.01323	0.00038	0.00411	0.00042	-0.028462		84.7	2.4	80.3	6.4	0	180	84.7	2.4		1.26773
	Zircon-99	130.5	111.1	0.851341	0.043	0.011	0.0279	0.0075	0.00496	0.00031	0.00154	0.00023	-0.044492		31.9	2	27.4	7.2	-290	440	31.9	2		1.17462
	Zircon-100	102.5	35.2	0.343415	0.0462	0.006	0.171	0.019	0.02573	0.001	0.0062	0.00098	0.048816		163.8	6.5	159	16	140	240	163.8	6.5		2.91193
	Sample: Yaq-43: coarse to medium-grained sandstone, 27°24´58.12"N and 112°24´12.46"O
	Zircon-01	284	125	0.440141	0.0499	0.0049	0.0801	0.0072	0.01206	0.00034	0.00401	0.00043	-0.047847		77.3	2.1	78.1	6.8	200	200	77.3	2.1		2.272
	Zircon-02	254	207	0.814961	0.0733	0.009	0.128	0.018	0.01262	0.00048	0.00519	0.00061	0.27819		80.8	3.1	122	15	1010	210	80.8	3.1		1.22705
	Zircon-03	253	176	0.695652	0.0514	0.0048	0.0821	0.0071	0.01165	0.00039	0.00401	0.00042	-0.044411		74.7	2.5	81.2	6.6	200	190	74.7	2.5		1.4375
	Zircon-04	165	128	0.775758	0.0638	0.0072	0.097	0.01	0.01044	0.00042	0.00359	0.00039	0.17973		67	2.7	93.8	9.5	720	240	67	2.7		1.28906
	Zircon-05	766	705	0.920366	0.0508	0.0029	0.269	0.012	0.03853	0.0008	0.0118	0.001	0.089117		243.7	5	242.1	9.5	220	130	243.7	5		1.08652
	Zircon-06	319	147	0.460815	0.0871	0.0048	2.95	0.14	0.2422	0.0081	0.0683	0.006	0.75722		1398	43	1395	41	1360	100	1398	43		2.17007
	Zircon-07	242	188	0.77686	0.051	0.0035	0.197	0.012	0.02837	0.0007	0.00866	0.00083	0.11269		180.4	4.4	182.3	9.9	220	150	180.4	4.4		1.28723
	Zircon-08	302	105	0.347682	0.1003	0.0053	3.95	0.2	0.286	0.01	0.0829	0.0072	0.81039		1624	53	1626	46	1626	98	1626	98		2.87619
	Zircon-09	500	311	0.622	0.0735	0.0063	0.141	0.011	0.01374	0.00039	0.00528	0.00067	0.25281		88	2.5	133.5	9.7	1080	150	88	2.5		1.60772
	Zircon-10	241	224	0.929461	0.048	0.0072	0.0321	0.0038	0.00462	0.00024	0.00153	0.00018	-0.29518		29.7	1.6	32	3.8	230	270	29.7	1.6		1.07589
	Zircon-11	344	170	0.494186	0.0564	0.0047	0.1061	0.0075	0.01322	0.0004	0.00438	0.00049	0.030868		84.6	2.6	102.2	6.9	450	170	84.6	2.6		2.02353
	Zircon-12	318	221	0.694969	0.0471	0.0037	0.187	0.013	0.02823	0.00067	0.00889	0.00084	0.037597		179.5	4.2	174	11	80	160	179.5	4.2		1.43891
	Zircon-13	453	441	0.97351	0.0499	0.0039	0.0752	0.0052	0.01102	0.0003	0.00337	0.00031	0.093354		70.7	1.9	73.6	4.9	230	170	70.7	1.9		1.02721
	Zircon-14	233	153	0.656652	0.0877	0.0048	2.82	0.12	0.2348	0.0045	0.0654	0.0058	0.48302		1360	23	1361	31	1380	100	1360	23		1.52288
	Zircon-15	284	121	0.426056	0.0507	0.0047	0.1183	0.0095	0.01707	0.00055	0.00567	0.00057	-0.14138		109.1	3.5	113.2	8.2	300	200	109.1	3.5		2.34711
	Zircon-16	110	77	0.7	0.0515	0.0051	0.169	0.014	0.02401	0.0008	0.00823	0.00083	-0.078224		152.9	5	158	12	210	190	152.9	5		1.42857
	Zircon-17	1049	58	0.0552908	0.1031	0.0054	3.48	0.25	0.24	0.016	0.076	0.0074	0.94127		1386	83	1523	63	1680	95	1680	95		18.0862
	Zircon-18	1099	569	0.517743	0.0533	0.0086	0.0828	0.0046	0.01156	0.00073	0.00391	0.00047	0.29984		74.1	4.7	82.9	4.3	310	180	74.1	4.7		1.93146
	Zircon-19	503	124	0.246521	0.065	0.016	0.137	0.041	0.01571	0.00058	0.0085	0.003	0.41383		100.5	3.6	130	32	740	280	100.5	3.6		4.05645
	Zircon-20	490	110	0.22449	0.0497	0.0042	0.0753	0.0054	0.01129	0.0003	0.00367	0.0004	-0.063268		72.4	1.9	74.3	4.9	190	160	72.4	1.9		4.45455
	Zircon-21	636	736	1.15723	0.0537	0.004	0.0769	0.005	0.01063	0.00029	0.00319	0.0003	-0.11669		68.2	1.9	76	4.7	370	160	68.2	1.9		0.86413
	Zircon-22	551	448	0.813067	0.0509	0.0038	0.0727	0.0052	0.01081	0.00032	0.00342	0.00033	0.39636		69.5	2.1	71.2	4.9	210	160	69.5	2.1		1.22991
	Zircon-23	602	539	0.895349	0.0895	0.0047	2.95	0.12	0.2406	0.0046	0.0678	0.006	0.22727		1390	24	1396	30	1410	100	1390	24		1.11688
	Zircon-24	504	586	1.1627	0.0489	0.0039	0.0811	0.0056	0.01148	0.00035	0.0039	0.00037	0.05399		73.6	2.3	79	5.3	150	170	73.6	2.3		0.860068
	Zircon-25	293	272	0.928328	0.0526	0.0037	0.192	0.011	0.02642	0.00068	0.00899	0.0008	-0.15821		168.1	4.2	179.2	9.8	340	160	168.1	4.2		1.07721
	Zircon-26	694	164	0.236311	0.0525	0.0036	0.095	0.0058	0.01394	0.00035	0.0049	0.00051	0.43034		89.3	2.2	92.1	5.4	310	150	89.3	2.2		4.23171
	Zircon-27	79	37	0.468354	0.08	0.0046	2.17	0.1	0.1977	0.0042	0.0611	0.0055	0.12622		1163	23	1174	33	1190	120	1163	23		2.13514
	Zircon-28	317	156	0.492114	0.0627	0.005	0.1216	0.0088	0.01427	0.00038	0.00565	0.00058	-0.0033218		91.4	2.4	116.3	8	630	170	91.4	2.4		2.03205
	Zircon-29	412	494	1.19903	0.0639	0.0091	0.0464	0.0062	0.00518	0.00018	0.00165	0.00019	-0.22617		33.3	1.1	45.9	5.9	810	230	33.3	1.1		0.834008
	Zircon-30	193	134	0.694301	0.0524	0.0061	0.0799	0.0087	0.01158	0.00038	0.00347	0.00038	-0.14589		74.2	2.4	77.8	8.1	240	220	74.2	2.4		1.4403
	Zircon-31	831	888	1.06859	0.0504	0.0035	0.0681	0.0053	0.01027	0.00029	0.00296	0.00032	0.53883		65.9	1.9	66.7	5.1	210	160	65.9	1.9		0.935811
	Zircon-32	526	469	0.891635	0.0493	0.0035	0.176	0.011	0.02593	0.00062	0.00807	0.00073	0.064956		165	3.9	164.1	9.3	140	150	165	3.9		1.12154
	Zircon-33	396	223	0.563131	0.048	0.0043	0.0835	0.0064	0.01247	0.00033	0.00416	0.00041	-0.12529		79.9	2.1	81.3	6	100	180	79.9	2.1		1.77578
	Zircon-34	387	195	0.503876	0.0492	0.0039	0.0979	0.006	0.01441	0.0004	0.00468	0.00046	-0.080145		92.2	2.5	94.7	5.6	170	160	92.2	2.5		1.98462
	Zircon-35	463	423	0.913607	0.0487	0.0044	0.0784	0.0061	0.01199	0.00032	0.00373	0.00035	0.15152		76.8	2	76.5	5.8	100	180	76.8	2		1.09456
	Zircon-36	686	305	0.444606	0.0493	0.0038	0.0958	0.0066	0.01398	0.0003	0.00463	0.00043	0.057167		89.5	1.9	92.7	6.1	180	170	89.5	1.9		2.24918
	Zircon-37	257	106	0.412451	0.0492	0.0044	0.1087	0.0092	0.01573	0.00042	0.0051	0.00053	-0.13705		100.6	2.6	105.6	8.1	180	180	100.6	2.6		2.42453
	Zircon-38	514	203	0.394942	0.0519	0.0042	0.0829	0.0061	0.01197	0.00031	0.00422	0.00041	0.14241		76.7	2	80.7	5.7	240	170	76.7	2		2.53202
	Zircon-39	549	228	0.415301	0.0504	0.0059	0.0306	0.0033	0.00447	0.00014	0.00148	0.00018	0.029643		28.76	0.91	30.5	3.2	190	240	28.76	0.91		2.40789
	Zircon-40	1058	569	0.537807	0.0509	0.004	0.0317	0.0024	0.00478	0.00016	0.00148	0.00015	0.39501		30.8	1	31.7	2.4	220	160	30.8	1		1.8594
	Zircon-41	447	295	0.659955	0.05	0.0043	0.0701	0.0054	0.01009	0.00028	0.00334	0.00034	0.11078		64.7	1.8	68.7	5.1	220	170	64.7	1.8		1.51525
	Zircon-42	407	520	1.27764	0.0708	0.0078	0.122	0.012	0.01252	0.00035	0.0047	0.00048	0.061226		80.2	2.2	116	11	920	190	80.2	2.2		0.782692
	Zircon-43	279	145	0.519713	0.0516	0.0052	0.0966	0.0091	0.01401	0.00041	0.00495	0.00048	0.13832		89.7	2.6	94.4	8.6	200	210	89.7	2.6		1.92414
	Zircon-44	880	248	0.281818	0.098	0.005	3.39	0.13	0.2537	0.0047	0.072	0.0064	0.5641		1458	24	1503	31	1580	100	1580	100		3.54839
	Zircon-45	189	95	0.502646	0.061	0.072	0.2	1	0.0263	0.0089	0.009	0.03	0.41111		167	54	200	250	570	540	167	54		1.98947
	Zircon-46	349	227	0.65043	0.0953	0.0067	0.265	0.016	0.02048	0.0005	0.00888	0.00082	-0.016238		130.7	3.2	238	13	1540	140	130.7	3.2		1.53744
	Zircon-47	275	243	0.883636	0.056	0.02	0.033	0.017	0.00474	0.00029	0.00167	0.00044	0.063		30.5	1.9	33	16	290	400	30.5	1.9		1.13169
	Zircon-48	645	380	0.589147	0.0495	0.0033	0.1159	0.0063	0.01706	0.00039	0.00558	0.00052	-0.19478		109	2.4	111.2	5.7	150	140	109	2.4		1.69737
	Zircon-49	2553	4417	1.73012	0.0724	0.0042	0.0656	0.0058	0.00651	0.00055	0.00211	0.00035	-0.0057376		41.9	3.5	64.5	5.4	960	170	41.9	3.5		0.577994
	Zircon-50	1659	599	0.361061	0.0572	0.0038	0.0603	0.0077	0.00778	0.0008	0.00455	0.00042	0.79655		49.9	5.1	59.4	7.2	470	140	49.9	5.1		2.76962
	Zircon-51	322	221	0.686335	0.0517	0.0044	0.0814	0.0063	0.0119	0.00034	0.00381	0.00038	-0.054577		76.2	2.1	79.3	5.9	220	180	76.2	2.1		1.45701
	Zircon-52	463	644	1.39093	0.0524	0.0036	0.182	0.011	0.02536	0.00059	0.00789	0.00071	0.32934		161.4	3.7	169.8	9.3	270	150	161.4	3.7		0.718944
	Zircon-53	675	238	0.352593	0.0506	0.0034	0.0957	0.006	0.01407	0.00036	0.0045	0.00045	0.41737		90	2.3	92.7	5.6	200	150	90	2.3		2.83613
	Zircon-54	171	91	0.532164	0.0577	0.007	0.121	0.013	0.01541	0.00049	0.0045	0.00052	-0.11485		98.6	3.1	115	12	480	240	98.6	3.1		1.87912
	Zircon-55	475	258	0.543158	0.0458	0.0036	0.0852	0.0058	0.01362	0.00031	0.00422	0.0004	-0.19134		87.2	2	82.9	5.4	-20	160	87.2	2		1.84109
	Zircon-56	119	70	0.588235	0.1211	0.0064	5.26	0.21	0.3142	0.0067	0.1012	0.0089	-0.029155		1761	33	1861	36	1978	95	1978	95		1.7
	Zircon-57	382	97	0.253927	0.061	0.0049	0.1237	0.0092	0.01476	0.00037	0.00735	0.00091	-0.13436		94.5	2.4	118.2	8.2	620	150	94.5	2.4		3.93814
	Zircon-58	448	529	1.1808	0.0652	0.0064	0.0418	0.004	0.00484	0.00017	0.00162	0.00017	0.054419		31.1	1.1	42.4	3.9	700	190	31.1	1.1		0.846881
	Zircon-59	504	373	0.740079	0.0562	0.0044	0.0908	0.0071	0.01286	0.00039	0.00417	0.00043	0.31152		82.3	2.5	90.3	6.6	400	160	82.3	2.5		1.35121
	Zircon-60	206	369	1.79126	0.0491	0.0038	0.181	0.012	0.0263	0.00068	0.00784	0.00072	0.059129		167.3	4.3	169	10	160	170	167.3	4.3		0.558266
	Zircon-61	232	89	0.383621	0.0528	0.0049	0.1041	0.0086	0.0149	0.00055	0.00535	0.00061	0.13632		95.4	3.5	101.5	8.3	250	200	95.4	3.5		2.60674
	Zircon-62	237	112	0.472574	0.0482	0.0046	0.0918	0.008	0.01436	0.00043	0.00476	0.00053	0.068122		91.9	2.7	91	7.9	80	200	91.9	2.7		2.11607
	Zircon-63	265	154	0.581132	0.0498	0.0044	0.1083	0.0092	0.0157	0.0004	0.00502	0.00049	0.12827		100.4	2.5	104.1	8.4	180	180	100.4	2.5		1.72078
	Zircon-64	227	108	0.475771	0.0604	0.0054	0.1067	0.0094	0.01335	0.0005	0.00478	0.00055	-0.021881		85.5	3.2	102.7	8.6	550	210	85.5	3.2		2.10185
	Zircon-65	487	296	0.607803	0.0701	0.0064	0.1144	0.0077	0.01119	0.00031	0.00485	0.00044	-0.0043583		71.7	2	109.7	7.1	1000	170	71.7	2		1.64527
	Zircon-67	435	368	0.845977	0.0519	0.0036	0.179	0.011	0.02572	0.00058	0.00838	0.00076	0.088867		163.7	3.7	167	9.1	260	150	163.7	3.7		1.18207
	Zircon-68	689	675	0.979681	0.0494	0.0052	0.0313	0.003	0.00463	0.00015	0.0015	0.00014	-0.17117		29.77	0.95	31.2	2.9	130	200	29.77	0.95		1.02074
	Zircon-69	301	246	0.817276	0.1015	0.0054	4.2	0.17	0.2962	0.0061	0.083	0.0076	0.5088		1672	30	1674	33	1650	95	1650	95		1.22358
	Zircon-70	2640	2143	0.811742	0.056	0.041	0.024	0.053	0.00313	0.00071	0.0013	0.0013	0.079108		20.2	4.6	24	44	400	470	20.2	4.6		1.23192
	Zircon-71	659	226	0.342944	0.0551	0.0048	0.0966	0.0073	0.01243	0.00028	0.00539	0.00055	0.10407		79.6	1.8	93.4	6.9	440	180	79.6	1.8		2.91593
	Zircon-72	143	61	0.426573	0.0535	0.0092	0.0371	0.0067	0.00498	0.00026	0.00165	0.00031	0.024442		32	1.7	36.7	6.5	310	330	32	1.7		2.34426
	Zircon-73	159	97	0.610063	0.07	0.01	0.0483	0.0071	0.00502	0.00025	0.00186	0.00025	0.10612		32.3	1.6	47.6	6.8	830	270	32.3	1.6		1.63918
	Zircon-74	332	316	0.951807	0.103	0.013	0.0657	0.0086	0.0047	0.00021	0.00206	0.00027	0.21043		30.2	1.4	64.5	8	1720	190	30.2	1.4		1.05063
	Zircon-75	243	174	0.716049	0.0815	0.0096	0.0527	0.0057	0.00454	0.00018	0.00196	0.00023	0.28399		29.2	1.2	52	5.4	1120	210	29.2	1.2		1.39655
	Zircon-76	674	685	1.01632	0.0513	0.0051	0.0329	0.0027	0.00475	0.00015	0.00149	0.00014	-0.27547		30.54	0.96	32.8	2.6	270	200	30.54	0.96		0.983942
	Zircon-77	131	112	0.854962	0.0513	0.0084	0.086	0.013	0.0118	0.00058	0.00427	0.00044	0.48191		75.6	3.7	83	12	190	270	75.6	3.7		1.16964
	Zircon-78	528	389	0.736742	0.056	0.0043	0.1111	0.0072	0.0145	0.00035	0.00457	0.00042	-0.19961		92.8	2.2	106.9	6.5	450	160	92.8	2.2		1.35733
	Zircon-79	492	241	0.489837	0.0485	0.004	0.0854	0.0064	0.01289	0.00034	0.00409	0.0004	0.11696		82.5	2.1	84.7	5.6	180	160	82.5	2.1		2.04149
	Zircon-80	381	238	0.624672	0.0523	0.006	0.0356	0.0037	0.00505	0.00018	0.00164	0.0002	0.014714		32.5	1.1	35.4	3.6	260	230	32.5	1.1		1.60084
	Zircon-81	122	50	0.409836	0.0536	0.0058	0.162	0.014	0.02204	0.00075	0.00874	0.00096	-0.18092		140.5	4.7	154	12	410	220	140.5	4.7		2.44
	Zircon-82	641	430	0.670827	0.0492	0.0037	0.0739	0.0051	0.01099	0.00026	0.00349	0.00033	0.072803		70.4	1.6	72.3	4.8	150	160	70.4	1.6		1.4907
	Sample: Yaq-46, medium to coarse-coarse grained sandstone; 27°24´52.95"N and 112°24´11.09"O
	Zircon-01	416	209	0.502404	0.0497	0.0032	0.0881	0.0052	0.013	0.00027	0.0043	0.0025	0.0048138		83.2	1.7	85.6	4.8	365	87	83.2	1.7		1.99043
	Zircon-02	233	184	0.7897	0.127	0.014	0.0866	0.0085	0.00507	0.00021	0.0025	0.0015	-0.27071		32.6	1.4	84.2	7.6	2052	86	32.6	1.4		1.2663
	Zircon-03	2931	2800	0.955305	0.0649	0.0082	0.085	0.012	0.00974	0.00021	0.0029	0.0015	0.50772		62.5	1.4	83	11	750	180	62.5	1.4		1.04679
	Zircon-04	401	137	0.341646	0.0657	0.0051	0.136	0.049	0.0153	0.0032	0.0071	0.0063	-0.15816		98	20	129	37	840	110	98	20		2.92701
	Zircon-05	865	799	0.923699	0.0526	0.0031	0.088	0.0049	0.01207	0.00022	0.0038	0.0023	0.12697		77.3	1.4	85.6	4.6	345	64	77.3	1.4		1.0826
	Zircon-06	440	119	0.270455	0.051	0.0035	0.1097	0.0068	0.01614	0.00039	0.0054	0.0032	0.15083		103.2	2.5	105.5	6.2	390	79	103.2	2.5		3.69748
	Zircon-07	2273	557	0.245051	0.0477	0.0023	0.0672	0.006	0.0102	0.00069	0.0046	0.0028	0.28011		65.4	4.4	66	5.6	144	59	65.4	4.4		4.08079
	Zircon-08	961	428	0.445369	0.0491	0.0028	0.0917	0.0052	0.01364	0.00026	0.0047	0.0027	0.39958		87.3	1.6	89	4.8	215	63	87.3	1.6		2.24533
	Zircon-09	215	85	0.395349	0.1023	0.0038	3.84	0.13	0.274	0.0042	0.08	0.047	0.37479		1561	21	1600	27	1674	40	1674	40		2.52941
	Zircon-10	627	531	0.84689	0.06	0.0037	0.1007	0.0066	0.01217	0.00027	0.004	0.0024	0.38337		77.9	1.7	97.2	6	630	100	77.9	1.7		1.18079
	Zircon-11	564	556	0.985816	0.0646	0.0034	0.1101	0.0055	0.0124	0.0003	0.0044	0.0026	0.14605		79.4	1.9	106	5.1	770	56	79.4	1.9		1.01439
	Zircon-12	386	120	0.310881	0.0488	0.0031	0.101	0.0069	0.01511	0.00035	0.0047	0.0029	0.40232		96.7	2.2	97.6	6.3	377	81	96.7	2.2		3.21667
	Zircon-13	195	296	1.51795	0.164	0.02	0.12	0.013	0.0052	0.00024	0.0024	0.0014	0.33617		33.7	1.5	116	12	2520	130	33.7	1.5		0.658784
	Zircon-14	492	431	0.876016	0.0517	0.0036	0.0772	0.0056	0.01115	0.00026	0.0036	0.0021	0.033051		71.5	1.7	75.3	5.3	398	71	71.5	1.7		1.14153
	Zircon-15	571	207	0.362522	0.0487	0.003	0.0953	0.0056	0.01427	0.00029	0.0045	0.0027	0.031926		91.3	1.9	92.3	5.2	234	57	91.3	1.9		2.75845
	Zircon-16	228	103	0.451754	0.0544	0.004	0.1116	0.0076	0.01522	0.00039	0.0049	0.0029	-0.24795		97.3	2.5	107.3	6.9	434	86	97.3	2.5		2.21359
	Zircon-17	524	198	0.377863	0.0495	0.0026	0.1212	0.0061	0.01792	0.00033	0.0056	0.0033	0.099551		114.5	2.1	116.1	5.5	254	68	114.5	2.1		2.64646
	Zircon-18	447	142	0.317673	0.077	0.056	0.2	0.49	0.0208	0.0044	0.015	0.05	0.63072		133	27	200	170	1160	340	133	27		3.14789
	Zircon-19	334	504	1.50898	0.051	0.0042	0.0773	0.006	0.01123	0.00026	0.0036	0.0021	0.041492		72	1.6	75.5	5.6	440	110	72	1.6		0.662698
	Zircon-20	377	289	0.766578	0.0496	0.0055	0.0685	0.0075	0.01	0.00022	0.0029	0.0022	-0.074281		64.1	1.4	67.1	6.8	390	120	64.1	1.4		1.3045
	Zircon-21	228	133	0.583333	0.0545	0.0049	0.0856	0.0079	0.01143	0.00031	0.0038	0.0023	0.17315		73.3	1.9	85.1	7.3	513	99	73.3	1.9		1.71429
	Zircon-22	693	823	1.18759	0.0489	0.0027	0.0748	0.004	0.01112	0.00022	0.0036	0.0021	0.37191		71.3	1.4	73.2	3.8	271	72	71.3	1.4		0.842041
	Zircon-23	280	138	0.492857	0.0487	0.0036	0.0978	0.0072	0.01481	0.00032	0.0045	0.003	0.0053755		94.8	2.1	94.5	6.6	291	87	94.8	2.1		2.02899
	Zircon-24	222	101	0.454955	0.0504	0.0036	0.092	0.0058	0.01345	0.00033	0.0045	0.0026	-0.23856		86.1	2.1	89.3	5.3	305	73	86.1	2.1		2.19802
	Zircon-25	137	46	0.335766	0.0522	0.0041	0.154	0.011	0.02159	0.00055	0.0076	0.0043	-0.023704		137.7	3.5	150	9.1	462	91	137.7	3.5		2.97826
	Zircon-26	680	337	0.495588	0.0491	0.0027	0.0797	0.0042	0.01197	0.00023	0.0039	0.0024	0.16861		76.7	1.4	78.4	4	236	72	76.7	1.4		2.0178
	Zircon-27	109	67	0.614679	0.0886	0.0036	3.09	0.11	0.2517	0.0041	0.074	0.044	0.23829		1447	21	1430	28	1393	45	1393	45		1.62687
	Zircon-28	252	147	0.583333	0.0489	0.0036	0.0965	0.0062	0.014	0.00039	0.0049	0.0029	-0.10783		89.6	2.5	93.4	5.7	390	100	89.6	2.5		1.71429
	Zircon-29	652	312	0.478528	0.0478	0.0025	0.1	0.005	0.01498	0.00025	0.0048	0.0028	-0.039889		95.8	1.6	96.7	4.6	237	65	95.8	1.6		2.08974
	Zircon-30	236	135	0.572034	0.047	0.0052	0.0744	0.0094	0.0113	0.00034	0.0036	0.0024	0.24124		72.4	2.2	72.8	8.7	250	200	72.4	2.2		1.74815
	Zircon-31	448	485	1.08259	0.0535	0.0051	0.08	0.0065	0.01082	0.0003	0.0033	0.0021	-0.12284		69.4	1.9	78	6.1	410	100	69.4	1.9		0.923711
	Zircon-32	31	12	0.387097	0.056	0.013	0.134	0.032	0.0188	0.0011	0.0067	0.0046	0.22797		120	6.8	125	29	840	160	120	6.8		2.58333
	Zircon-33	895	249	0.278212	0.0512	0.0023	0.162	0.014	0.0225	0.0015	0.0084	0.007	0.48219		143.5	9.1	152	12	252	57	143.5	9.1		3.59438
	Zircon-34	670	68	0.101493	0.073	0.082	0.37	0.38	0.035	0.01	0	0.12	-0.16927		219	62	320	140	960	380	219	62		9.85294
	Zircon-35	485	278	0.573196	0.0484	0.0035	0.0841	0.0056	0.01236	0.00025	0.0038	0.0022	0.029807		79.2	1.6	81.9	5.2	327	85	79.2	1.6		1.7446
	Sample: Yaq-49: medium-grained sandstone, 27°24´39.86"N and 112°24´24.63"O
	Zircon-01	368	167	0.453804	0.1027	0.0054	4.03	0.16	0.2857	0.0054	0.083	0.0073	0.11147		1620	27	1640	33	1670	100	1670	100		2.20359
	Zircon-02	161	107	0.664596	0.0474	0.0092	0.0327	0.0058	0.00518	0.00034	0.00183	0.00025	-0.091835		33.3	2.2	32.5	5.7	-40	350	33.3	2.2		1.50467
	Zircon-03	349	259	0.74212	0.0494	0.0049	0.0742	0.0064	0.01097	0.00032	0.00349	0.00035	-0.0082389		70.4	2	72.6	5.9	160	200	70.4	2		1.34749
	Zircon-04	248	153	0.616935	0.0538	0.0052	0.108	0.0093	0.01534	0.00041	0.00466	0.00048	-0.22568		98.1	2.6	104	8.4	340	180	98.1	2.6		1.62092
	Zircon-05	593	325	0.548061	0.0503	0.0052	0.137	0.014	0.02027	0.00046	0.0065	0.00076	0.087302		129.4	2.9	132	12	190	200	129.4	2.9		1.82462
	Zircon-06	229	122	0.532751	0.0496	0.0053	0.0874	0.0087	0.01274	0.00043	0.00425	0.00043	-0.14138		81.6	2.7	84.7	8.3	140	210	81.6	2.7		1.87705
	Zircon-07	372	336	0.903226	0.1032	0.0054	4.31	0.18	0.3009	0.0064	0.0899	0.008	0.84527		1695	32	1694	34	1680	100	1680	100		1.10714
	Zircon-08	2913	7723	2.65122	0.0494	0.0034	0.0215	0.0013	0.003174	7.7e-05	0.000947	8.5e-05	0.12875		20.43	0.49	21.6	1.3	150	150	20.43	0.49		0.377185
	Zircon-09	823	1056	1.28311	0.046	0.0038	0.0321	0.0023	0.00508	0.00014	0.00157	0.00015	0.056268		32.66	0.9	32	2.3	10	170	32.66	0.9		0.779356
	Zircon-10	357	257	0.719888	0.0493	0.0045	0.0966	0.008	0.01421	0.0004	0.00428	0.00044	0.08421		91	2.6	93.4	7.4	200	190	91	2.6		1.38911
	Zircon-11	462	419	0.906926	0.0673	0.0083	0.0435	0.0046	0.00477	0.0002	0.00175	0.00017	-0.04536		30.7	1.3	43.1	4.5	790	270	30.7	1.3		1.10263
	Zircon-12	635	696	1.09606	0.0496	0.0044	0.036	0.0029	0.00543	0.00015	0.00164	0.00016	0.045919		34.88	0.98	35.8	2.8	160	190	34.88	0.98		0.912356
	Zircon-13	355	135	0.380282	0.096	0.011	0.0687	0.0079	0.00512	0.00022	0.0037	0.00042	0.067608		32.9	1.4	67.2	7.6	1440	240	32.9	1.4		2.62963
	Zircon-14	512	365	0.712891	0.0456	0.0051	0.0306	0.003	0.00491	0.00014	0.00167	0.00019	-0.21129		31.55	0.92	30.5	2.9	10	220	31.55	0.92		1.40274
	Zircon-15	911	603	0.66191	0.05	0.003	0.1319	0.0097	0.0195	0.0011	0.00654	0.00059	0.79158		124.8	7.1	125.7	8.8	180	140	124.8	7.1		1.51078
	Zircon-16	966	309	0.319876	0.1034	0.0054	4.28	0.17	0.2989	0.0059	0.0876	0.0076	0.22175		1686	29	1689	33	1685	96	1685	96		3.12621
	Zircon-18	322	162	0.503106	0.0486	0.0044	0.0982	0.0078	0.01488	0.00044	0.00489	0.00049	-0.11567		95.2	2.8	94.8	7.2	100	190	95.2	2.8		1.98765
	Zircon-19	411	207	0.50365	0.0511	0.0046	0.0772	0.0069	0.01102	0.00028	0.00381	0.00036	0.073711		70.7	1.8	75.2	6.4	290	180	70.7	1.8		1.98551
	Zircon-20	252	196	0.777778	0.0491	0.0042	0.0958	0.0074	0.01476	0.00049	0.00451	0.00044	0.20322		94.4	3.1	92.7	6.9	150	170	94.4	3.1		1.28571
	Zircon-21	230	67	0.291304	0.0504	0.0046	0.108	0.0086	0.01563	0.00038	0.00507	0.00061	0.066492		100	2.4	103.8	7.9	160	180	100	2.4		3.43284
	Zircon-22	4763	555	0.116523	0.0458	0.0029	0.0613	0.0075	0.00957	0.00091	0.00491	0.00048	0.054511		61.4	5.8	60.4	7	0	130	61.4	5.8		8.58198
	Zircon-23	4225	2661	0.629822	0.047	0.0028	0.0447	0.0022	0.00684	0.00014	0.00279	0.00034	0.035643		43.92	0.87	44.4	2.1	50	130	43.92	0.87		1.58775
	Zircon-24	189	94	0.497354	0.0514	0.0075	0.11	0.016	0.01568	0.0005	0.00607	0.00074	0.082737		100.3	3.2	105	14	240	250	100.3	3.2		2.01064
	Zircon-25	295	279	0.945763	0.0508	0.006	0.067	0.0072	0.00983	0.00035	0.00316	0.00031	-0.040989		63.1	2.2	66.6	6.6	140	240	63.1	2.2		1.05735
	Zircon-26	517	222	0.4294	0.0477	0.0036	0.1059	0.0072	0.01603	0.00047	0.005	0.00047	0.16014		102.5	3	102	6.7	90	160	102.5	3		2.32883
	Zircon-27	436	357	0.818807	0.0548	0.0062	0.0353	0.0037	0.00474	0.00015	0.00153	0.00016	0.03616		30.48	0.97	35.1	3.6	400	230	30.48	0.97		1.22129
	Zircon-28	514	348	0.677043	0.0467	0.0038	0.0875	0.0061	0.01356	0.00033	0.00434	0.0004	-0.19586		86.8	2.1	85	5.7	20	160	86.8	2.1		1.47701
	Zircon-29	407	149	0.366093	0.0465	0.0039	0.1001	0.0074	0.01545	0.00042	0.0046	0.00048	0.080898		98.9	2.7	97.6	7.1	50	180	98.9	2.7		2.73154
	Zircon-30	612	98	0.160131	0.1064	0.0055	4.54	0.18	0.3081	0.006	0.0894	0.0076	0.41666		1731	30	1737	33	1737	95	1737	95		6.2449
	Zircon-31	297	502	1.69024	0.052	0.0068	0.0404	0.0049	0.00565	0.00026	0.00157	0.00017	0.37747		36.3	1.7	40.1	4.8	310	240	36.3	1.7		0.591633
	Zircon-32	522	348	0.666667	0.0504	0.0046	0.0328	0.003	0.00481	0.00015	0.00157	0.00019	0.33645		30.91	0.93	33.2	3	170	190	30.91	0.93		1.5
	Zircon-33	740	654	0.883784	0.0555	0.0036	0.1044	0.008	0.01496	0.0004	0.00507	0.00046	0.70183		95.7	2.5	100.7	7.4	410	140	95.7	2.5		1.1315
	Zircon-34	130	102	0.784615	0.066	0.011	0.049	0.0075	0.00528	0.00028	0.00205	0.00022	-0.14852		34	1.8	48.4	7.2	730	300	34	1.8		1.27451
	Zircon-35	123	123	1	0.0498	0.0065	0.147	0.018	0.02132	0.00082	0.00644	0.00079	0.17564		136	5.2	139	16	190	240	136	5.2		1
	Zircon-36	361	200	0.554017	0.0549	0.0059	0.0343	0.0031	0.00462	0.00019	0.00164	0.00019	0.015671		29.7	1.2	34.2	3.1	380	240	29.7	1.2		1.805
	Zircon-37	345	443	1.28406	0.0633	0.0088	0.0372	0.0053	0.00463	0.00019	0.00148	0.0002	-0.15194		29.8	1.2	38.4	5.1	600	270	29.8	1.2		0.778781
	Zircon-38	470	265	0.56383	0.0502	0.0036	0.1	0.0063	0.01431	0.00036	0.00458	0.00045	0.16705		91.6	2.3	96.7	5.8	180	160	91.6	2.3		1.77358
	Zircon-39	477	238	0.498952	0.051	0.0055	0.033	0.0034	0.00468	0.00015	0.00183	0.00019	-0.0025228		30.1	0.96	32.9	3.3	160	210	30.1	0.96		2.0042
	Zircon-40	880	1304	1.48182	0.0653	0.0059	0.0424	0.0032	0.00465	0.00014	0.00155	0.00015	-0.0093346		29.91	0.88	42.2	3.1	770	180	29.91	0.88		0.674847
	Zircon-41	326	86	0.263804	0.0478	0.004	0.0972	0.0068	0.01444	0.00037	0.00518	0.00056	-0.18048		92.4	2.4	94.1	6.3	140	180	92.4	2.4		3.7907
	Zircon-42	133	52	0.390977	0.0653	0.0065	0.144	0.012	0.01616	0.00056	0.00676	0.00078	-0.03545		103.4	3.6	136	11	710	200	103.4	3.6		2.55769
	Zircon-43	327	113	0.345566	0.0529	0.0041	0.0901	0.0061	0.01244	0.00034	0.00405	0.0005	-0.12868		79.7	2.2	87.5	5.7	310	180	79.7	2.2		2.89381
	Zircon-44	922	980	1.06291	0.057	0.0047	0.035	0.0028	0.00458	0.00016	0.00148	0.00015	0.42205		29.5	1	34.9	2.7	480	190	29.5	1		0.940816
	Zircon-45	2782	864	0.310568	0.0477	0.0029	0.0571	0.0039	0.00864	0.0002	0.00436	0.00041	0.26467		55.4	1.2	56.3	3.7	80	130	55.4	1.2		3.21991
	Zircon-46	608	370	0.608553	0.0487	0.0033	0.0965	0.0058	0.01431	0.00035	0.00462	0.00043	0.14327		91.6	2.2	93.5	5.4	120	150	91.6	2.2		1.64324
	Zircon-47	891	647	0.72615	0.0469	0.0032	0.0896	0.0053	0.01373	0.0003	0.00412	0.00038	0.083024		87.9	1.9	87.1	5	60	150	87.9	1.9		1.37713
	Zircon-48	2611	3284	1.25776	0.0487	0.0036	0.0192	0.0017	0.00283	0.00016	0.00088	0.00011	0.018802		18.2	1	19.3	1.7	230	160	18.2	1		0.795067
	Zircon-49	294	225	0.765306	0.0513	0.0058	0.0791	0.0079	0.01116	0.0004	0.00351	0.00036	-0.38306		71.6	2.5	77.1	7.5	210	220	71.6	2.5		1.30667
	Zircon-50	112	126	1.125	0.218	0.037	0.202	0.046	0.00697	0.0005	0.00408	0.00089	-0.0028887		44.8	3.2	185	35	2870	210	2870	210		0.888889
	Zircon-51	447	350	0.782998	0.0493	0.004	0.0958	0.0069	0.01401	0.00036	0.00455	0.00042	-0.19763		89.7	2.3	93.5	6.2	170	180	89.7	2.3		1.27714
	Zircon-52	272	157	0.577206	0.0541	0.005	0.0843	0.0066	0.01131	0.0004	0.00416	0.00042	-0.091005		72.5	2.6	82.1	5.9	350	190	72.5	2.6		1.73248
	Zircon-53	899	461	0.512792	0.0468	0.0034	0.0737	0.0046	0.0114	0.00027	0.00349	0.00032	0.23647		73.1	1.7	72.1	4.3	30	150	73.1	1.7		1.95011
	Zircon-54	1210	752	0.621488	0.0525	0.0041	0.0329	0.0025	0.00473	0.00019	0.00155	0.00014	0.39794		30.4	1.2	32.8	2.5	260	170	30.4	1.2		1.60904
	Zircon-55	509	308	0.605108	0.0877	0.0046	2.96	0.12	0.2433	0.0048	0.0693	0.0061	0.24329		1404	25	1397	30	1380	100	1404	25		1.6526
	Zircon-56	990	852	0.860606	0.051	0.027	0.035	0.029	0.00498	0.00032	0.0015	0.0011	0.37044		32	2	35	25	250	420	32	2		1.16197
	Zircon-57	162	123	0.759259	0.141	0.012	0.475	0.037	0.02413	0.00086	0.0148	0.0015	0.4062		153.7	5.4	396	26	2230	150	153.7	5.4		1.31707
	Zircon-58	140	96	0.685714	0.056	0.0056	0.116	0.011	0.0156	0.00053	0.0055	0.00053	-0.077162		99.8	3.4	110	10	360	240	99.8	3.4		1.45833
	Zircon-59	119	67	0.563025	0.0509	0.0084	0.104	0.016	0.01522	0.00066	0.00516	0.00074	-0.17675		97.3	4.2	100	14	180	280	97.3	4.2		1.77612
	Zircon-60	949	135	0.142255	0.0479	0.0028	0.1457	0.0076	0.02194	0.00047	0.00674	0.00064	0.14297		139.9	3	138	6.7	90	130	139.9	3		7.02963
	Zircon-61	5509	5739	1.04175	0.0467	0.003	0.01933	0.00089	0.002959	7.2e-05	0.000944	8.4e-05	-0.18172		19.04	0.46	19.44	0.89	60	130	19.04	0.46		0.959923
	Zircon-62	112	48	0.428571	0.055	0.0054	0.135	0.011	0.01759	0.00065	0.0056	0.00066	-0.011281		112.4	4.1	128	10	380	220	112.4	4.1		2.33333
	Zircon-63	256	190	0.742188	0.0533	0.0048	0.0871	0.0071	0.01197	0.00036	0.00347	0.00033	0.094322		76.7	2.3	84.5	6.6	330	190	76.7	2.3		1.34737
	Zircon-64	187	38	0.203209	0.0526	0.0045	0.151	0.014	0.02146	0.00098	0.0084	0.00096	0.48175		136.8	6.2	142	13	310	160	136.8	6.2		4.92105
	Zircon-65	383	181	0.472585	0.0565	0.0067	0.0332	0.0038	0.00425	0.00017	0.0014	0.00016	-0.074146		27.4	1.1	34	3.7	460	250	27.4	1.1		2.11602
	Zircon-66	237	71	0.299578	0.0675	0.0098	0.11	0.016	0.0116	0.00043	0.00483	0.00069	0.12664		74.4	2.7	105	14	760	220	74.4	2.7		3.33803
	Zircon-67	804	359	0.446517	0.0609	0.0035	0.197	0.01	0.02288	0.00051	0.00795	0.00072	0.27624		145.8	3.2	182.7	8.6	630	120	145.8	3.2		2.23955
	Zircon-68	248	139	0.560484	0.0783	0.0066	0.18	0.013	0.0166	0.00055	0.00668	0.00073	0.34885		106.1	3.5	168	12	1110	170	106.1	3.5		1.78417
	Zircon-69	309	330	1.06796	0.0529	0.0044	0.1009	0.0077	0.01383	0.00037	0.00437	0.00041	0.23749		88.5	2.3	97.4	7.1	270	180	88.5	2.3		0.936364
	Zircon-70	164	80	0.487805	0.1113	0.0059	5.13	0.21	0.3321	0.0069	0.0955	0.0085	0.39936		1848	33	1841	35	1818	97	1818	97		2.05
	Zircon-71	313	52	0.166134	0.0981	0.0054	1.06	0.12	0.078	0.0073	0.0542	0.0056	0.1877		484	42	732	46	1610	99	484	42		6.01923
	Zircon-72	592	393	0.663851	0.0626	0.0043	0.171	0.01	0.01916	0.00051	0.0082	0.0015	-0.12249		122.3	3.2	160.9	8.5	720	140	122.3	3.2		1.50636
	Zircon-73	477	453	0.949686	0.0763	0.004	1.907	0.077	0.1811	0.0034	0.0505	0.0045	0.095411		1073	19	1083	27	1100	110	1073	19		1.05298
	Zircon-74	496	427	0.860887	0.0477	0.0039	0.0773	0.0059	0.01172	0.00031	0.0036	0.00034	0.10223		75.1	2	75.5	5.5	90	170	75.1	2		1.16159
	Zircon-75	227	111	0.488987	0.0561	0.0067	0.0384	0.0042	0.00517	0.00026	0.00183	0.00026	0.065073		33.2	1.7	38.2	4.1	500	240	33.2	1.7		2.04505
	Zircon-76	711	386	0.542897	0.0478	0.0045	0.0315	0.0028	0.00474	0.00014	0.00153	0.00016	-0.042231		30.48	0.9	31.5	2.7	70	190	30.48	0.9		1.84197
	Zircon-77	1004	317	0.315737	0.0474	0.003	0.095	0.0072	0.01479	0.00081	0.00498	0.00045	0.78431		94.7	5.2	92.1	6.7	60	140	94.7	5.2		3.16719
	Zircon-78	1765	3965	2.24646	0.0528	0.0042	0.0348	0.0055	0.00488	0.00069	0.00065	0.00026	0.85427		31.4	4.4	34.6	5.3	280	170	31.4	4.4		0.445145
	Zircon-79	720	940	1.30556	0.049	0.0047	0.0295	0.0026	0.00443	0.00014	0.00146	0.00013	0.039282		28.52	0.9	29.5	2.6	190	200	28.52	0.9		0.765957
	Zircon-80	373	307	0.823056	0.0481	0.0079	0.127	0.026	0.01875	0.00063	0.00597	0.00097	-0.275		119.7	4	123	21	90	220	119.7	4		1.21498
	Zircon-81	232	198	0.853448	0.0501	0.0058	0.0662	0.0072	0.00972	0.00034	0.00322	0.00033	-0.034349		62.3	2.1	64.9	6.8	140	230	62.3	2.1		1.17172
	Zircon-82	228	136	0.596491	0.0452	0.0052	0.0587	0.006	0.00948	0.00031	0.00305	0.00034	-0.050624		60.8	2	57.8	5.7	-70	220	60.8	2		1.67647
	Zircon-83	268	193	0.720149	0.0643	0.0052	0.1198	0.0085	0.01351	0.00038	0.00476	0.00047	-0.068		86.5	2.4	114.7	7.6	770	170	86.5	2.4		1.3886
	Zircon-84	436	258	0.591743	0.0496	0.0039	0.0895	0.0059	0.0132	0.00032	0.00421	0.00041	-0.0043523		84.5	2.1	86.9	5.5	160	170	84.5	2.1		1.68992
	Zircon-85	345	174	0.504348	0.0485	0.0039	0.0937	0.0066	0.0145	0.00037	0.00447	0.00045	-0.032441		92.8	2.4	90.7	6.2	100	170	92.8	2.4		1.98276
	Zircon-86	507	383	0.755424	0.0524	0.0041	0.1078	0.007	0.01499	0.00042	0.0046	0.00044	0.0079627		95.9	2.7	103.8	6.4	260	170	95.9	2.7		1.32376
	Zircon-87	570	230	0.403509	0.0498	0.0036	0.1014	0.0063	0.01489	0.00034	0.00475	0.00045	-0.16405		95.3	2.2	98	5.8	160	150	95.3	2.2		2.47826
	Zircon-88	191	144	0.753927	0.0454	0.0048	0.0599	0.0064	0.00968	0.00037	0.00306	0.00032	0.4886		62.1	2.3	58.9	6.2	0	200	62.1	2.3		1.32639
	Sample: Yaq-55: Ryolithe, 27°25´02.55"N and 112°24´36.20"O
	Zircon-01	331	151	0.456193	0.0517	0.0057	0.106	0.011	0.01491	0.00033	0.0048	0.0033	-0.29906		95.4	2.1	103	10	410	160	95.4	2.1		2.19205
	Zircon-02	452	358	0.792035	0.0496	0.0036	0.0957	0.0065	0.014	0.00033	0.0045	0.0026	0.028603		89.6	2.1	92.6	6	340	87	89.6	2.1		1.26257
	Zircon-03	307	174	0.566775	0.0473	0.007	0.0277	0.0043	0.00443	0.00014	0.00138	0.00082	0.17601		28.5	0.91	27.7	4.2	630	130	28.5	0.91		1.76437
	Zircon-04	362	343	0.947514	0.0509	0.0072	0.034	0.0042	0.00458	0.00014	0.00113	0.00082	-0.11638		29.45	0.91	33.9	4.1	730	100	29.45	0.91		1.05539
	Zircon-05	206	224	1.08738	0.052	0.0054	0.0733	0.0065	0.01039	0.00037	0.0032	0.0019	-0.24621		66.6	2.4	71.7	6.2	620	110	66.6	2.4		0.919643
	Zircon-06	221	283	1.28054	0.0507	0.0081	0.0302	0.0042	0.00452	0.00021	0.00138	0.00081	-0.36066		29.1	1.4	30.1	4.1	660	130	29.1	1.4		0.780919
	Zircon-07	224	198	0.883929	0.074	0.012	0.0481	0.0066	0.00447	0.00019	0.002	0.0012	0.20481		28.8	1.2	47.5	6.3	1180	160	28.8	1.2		1.13131
	Zircon-08	191	92	0.481675	0.0612	0.0059	0.124	0.012	0.01536	0.00052	0.006	0.0033	0.20722		98.2	3.3	118	10	680	110	98.2	3.3		2.07609
	Zircon-09	179	95	0.530726	0.0528	0.0052	0.11	0.01	0.01483	0.00047	0.005	0.003	-0.016828		94.9	3	105.2	9	433	96	94.9	3		1.88421
	Zircon-10	172	116	0.674419	0.068	0.01	0.0404	0.0056	0.00455	0.00025	0.0018	0.0011	0.015993		29.3	1.6	40	5.4	1110	130	29.3	1.6		1.48276
	Zircon-11	256	256	1	0.217	0.047	0.148	0.037	0.00482	0.00034	0.002	0.0024	0.41773		31	2.2	139	30	2980	180	2980	180		1
	Zircon-12	520	345	0.663462	0.0894	0.0033	3.043	0.096	0.2467	0.0036	0.068	0.04	0.24471		1421	18	1418	24	1409	40	1409	40		1.50725
	Zircon-13	153	174	1.13725	0.06	0.013	0.0377	0.0079	0.00463	0.00019	0.00163	0.00089	-0.12388		29.8	1.2	37.3	7.7	1010	200	29.8	1.2		0.87931
	Zircon-14	335	59	0.176119	0.1127	0.0042	3.45	0.11	0.223	0.0035	0.057	0.033	0.74184		1298	18	1516	26	1830	35	1830	35		5.67797
	Zircon-15	198	108	0.545455	0.071	0.013	0.0428	0.0093	0.0045	0.00025	0.002	0.0017	-0.039356		28.9	1.6	42.3	8.9	930	230	28.9	1.6		1.83333
	Zircon-16	576	441	0.765625	0.0525	0.0033	0.0943	0.0058	0.01303	0.00026	0.0043	0.0026	-0.16308		83.4	1.7	91.4	5.1	295	76	83.4	1.7		1.30612
	Zircon-17	179	133	0.743017	0.0597	0.0087	0.0414	0.0064	0.0046	0.00022	0.00193	0.00096	0.31514		29.6	1.4	41	6.2	770	150	29.6	1.4		1.34586
	Zircon-18	1903	508	0.266947	0.0612	0.0028	0.0783	0.0059	0.00912	0.00062	0.0054	0.0032	0.68309		58.5	4	76.5	5.4	625	68	58.5	4		3.74606
	Zircon-19	155	100	0.645161	0.0685	0.0084	0.0372	0.0044	0.00448	0.00025	0.0015	0.001	-0.11846		28.8	1.6	37	4.3	1210	160	28.8	1.6		1.55
	Zircon-20	685	301	0.439416	0.0486	0.0029	0.093	0.0056	0.01376	0.00024	0.0051	0.003	0.24932		88.1	1.5	90.2	4.9	252	79	88.1	1.5		2.27575
	Zircon-21	226	122	0.539823	0.0497	0.0043	0.1018	0.0075	0.01488	0.00032	0.0051	0.0029	0.1563		95.2	2	98	6.8	326	90	95.2	2		1.85246
	Zircon-22	260	278	1.06923	0.129	0.011	0.0853	0.007	0.00477	0.0002	0.0022	0.0013	0.099199		30.7	1.3	83	6.5	2120	100	30.7	1.3		0.935252
	Zircon-23	189	156	0.825397	0.0576	0.0072	0.0344	0.004	0.00453	0.00019	0.00166	0.00096	0.092639		29.2	1.2	34.2	3.9	720	100	29.2	1.2		1.21154
	Zircon-24	171	86	0.502924	0.0567	0.0066	0.114	0.012	0.01459	0.00042	0.0055	0.0034	-0.015554		93.4	2.6	109	11	600	140	93.4	2.6		1.98837
	Zircon-25	359	340	0.947075	0.0891	0.0083	0.0519	0.0048	0.0043	0.00017	0.0016	0.001	0.29768		27.7	1.1	51.3	4.6	1410	110	27.7	1.1		1.05588
	Zircon-26	187	119	0.636364	0.0532	0.0053	0.0949	0.0091	0.01341	0.00039	0.0045	0.0027	0.26327		85.9	2.5	91.7	8.2	520	110	85.9	2.5		1.57143
	Zircon-27	307	353	1.14984	0.0865	0.0095	0.0558	0.0052	0.00452	0.0002	0.0014	0.0011	0.074059		29.1	1.3	55.1	5	1420	110	29.1	1.3		0.869688
	Zircon-28	459	276	0.601307	0.0526	0.0026	0.1865	0.0093	0.02626	0.00047	0.0086	0.0053	-0.025696		167.1	3	173.6	7.5	260	80	167.1	3		1.66304
	Zircon-29	241	268	1.11203	0.0627	0.006	0.0357	0.0034	0.00436	0.00014	0.00157	0.00086	0.16353		28.02	0.93	35.3	3.3	690	97	28.02	0.93		0.899254
	Zircon-30	306	202	0.660131	0.0506	0.0062	0.0321	0.0037	0.00445	0.00018	0.00152	0.0009	0.15331		28.6	1.1	32	3.6	470	100	28.6	1.1		1.51485
	Sample: Yaq-62: medoum to coarse-grained sandstone, 27°25´09.44"N and 112°24´46.32"O
	Zircon-01	821	329	0.400731	0.0489	0.0034	0.0773	0.0048	0.01184	0.00027	0.00367	0.00035	0.40079		75.9	1.8	75.5	4.5	140	140	75.9	1.8		2.49544
	Zircon-02	190	116	0.610526	0.0713	0.0082	0.116	0.011	0.01169	0.00037	0.00464	0.0006	-0.095486		74.9	2.3	110.6	9.6	920	190	74.9	2.3		1.63793
	Zircon-03	183	85	0.464481	0.0742	0.0077	0.125	0.011	0.01211	0.00035	0.00452	0.00064	0.024708		77.6	2.2	119	10	990	210	77.6	2.2		2.15294
	Zircon-05	249	98	0.393574	0.0489	0.0044	0.0974	0.0082	0.01438	0.00039	0.0053	0.00054	-0.055383		92	2.5	94.1	7.6	110	180	92	2.5		2.54082
	Zircon-06	311	131	0.421222	0.0689	0.0054	0.15	0.011	0.01586	0.00052	0.0066	0.00072	0.33428		101.4	3.3	141.5	9.6	840	170	101.4	3.3		2.37405
	Zircon-07	579	383	0.661485	0.068	0.011	0.0371	0.0054	0.00358	0.00013	0.00151	0.00024	0.15418		23.05	0.86	37	5.2	860	190	23.05	0.86		1.51175
	Zircon-08	689	581	0.843251	0.0576	0.0056	0.0296	0.0027	0.00377	0.00013	0.00132	0.00015	0.039363		24.23	0.82	29.5	2.7	490	190	24.23	0.82		1.18589
	Zircon-09	302	163	0.539735	0.0505	0.0073	0.0274	0.0041	0.00396	0.00016	0.00135	0.00016	0.60429		25.5	1	27.4	4	210	260	25.5	1		1.85276
	Zircon-11	446	258	0.578475	0.0474	0.0051	0.0353	0.0034	0.00536	0.00016	0.00161	0.00018	-0.08369		34.4	1	35.2	3.4	70	200	34.4	1		1.72868
	Zircon-12	492	229	0.465447	0.0482	0.0038	0.0837	0.0054	0.01262	0.00031	0.00394	0.00039	0.03295		80.8	2	81.5	5	90	160	80.8	2		2.14847
	Zircon-13	281	34	0.120996	0.1002	0.0052	3.78	0.15	0.2727	0.0053	0.0697	0.0065	0.39341		1554	27	1588	32	1626	94	1626	94		8.26471
	Zircon-14	68	60	0.882353	0.1069	0.006	4.44	0.2	0.3025	0.0062	0.0931	0.0083	0.2618		1703	30	1718	38	1740	100	1740	100		1.13333
	Zircon-15	476	192	0.403361	0.0472	0.0035	0.0963	0.0064	0.01452	0.00034	0.00436	0.00044	-0.093449		92.9	2.2	93.2	5.9	70	160	92.9	2.2		2.47917
	Zircon-16	257	278	1.08171	0.053	0.024	0.027	0.017	0.00429	0.00024	0.00136	0.00039	-0.048143		27.6	1.6	27	16	110	430	27.6	1.6		0.92446
	Zircon-18	379	290	0.765172	0.056	0.011	0.0273	0.0048	0.00356	0.00015	0.00133	0.00016	-0.076069		22.89	0.97	27.2	4.7	530	290	22.89	0.97		1.3069
	Zircon-19	206	122	0.592233	0.1012	0.0055	4.13	0.17	0.2928	0.006	0.0849	0.0074	0.34154		1658	30	1659	34	1641	98	1641	98		1.68852
	Zircon-21	180	85	0.472222	0.0492	0.0047	0.0975	0.0083	0.0144	0.00054	0.0046	0.0005	0.043018		92.2	3.4	95.4	7.4	140	200	92.2	3.4		2.11765
	Zircon-22	343	219	0.638484	0.0491	0.0069	0.0263	0.0032	0.00384	0.00014	0.00128	0.00014	0.12942		24.72	0.93	26.3	3.1	180	250	24.72	0.93		1.56621
	Zircon-23	636	452	0.710692	0.0497	0.0054	0.0302	0.0031	0.00435	0.00016	0.00186	0.00024	0.15821		28	1.1	30.2	3	250	180	28	1.1		1.40708
	Zircon-24	428	279	0.651869	0.053	0.011	0.0282	0.0068	0.00395	0.00013	0.00127	0.00025	0.18858		25.44	0.87	29.2	6.6	360	300	25.44	0.87		1.53405
	Zircon-25	506	378	0.747036	0.0504	0.0054	0.0256	0.0026	0.00377	0.00014	0.0013	0.00016	0.19306		24.23	0.91	25.7	2.5	170	210	24.23	0.91		1.33862
	Zircon-26	907	575	0.633958	0.0493	0.0047	0.0783	0.0075	0.01142	0.00035	0.00442	0.00046	0.3467		73.2	2.2	76.5	6.9	150	170	73.2	2.2		1.57739
	Zircon-27	645	1035	1.60465	0.0721	0.0038	1.591	0.071	0.1611	0.0054	0.0546	0.0044	0.71843		963	30	966	30	1020	110	963	30		0.623188
	Zircon-28	230	85	0.369565	0.0492	0.0052	0.1016	0.0094	0.01473	0.00042	0.00547	0.0006	-0.36885		94.2	2.7	97.8	8.6	180	200	94.2	2.7		2.70588
	Zircon-29	572	349	0.61014	0.0484	0.0039	0.0576	0.0038	0.00866	0.00022	0.0025	0.00027	0.36584		55.6	1.4	56.8	3.6	100	160	55.6	1.4		1.63897
	Zircon-30	215	95	0.44186	0.0608	0.0093	0.0294	0.0045	0.00379	0.00016	0.00164	0.00023	0.2391		24.4	1	30.5	4.4	390	300	24.4	1		2.26316
	Zircon-31	823	831	1.00972	0.0491	0.0055	0.0234	0.0023	0.00351	0.00012	0.00116	0.00011	-0.13014		22.6	0.78	23.5	2.3	150	210	22.6	0.78		0.990373
	Zircon-32	430	62	0.144186	0.0484	0.0039	0.0966	0.0069	0.01436	0.00038	0.005	0.00058	-0.056177		91.9	2.4	93.5	6.2	160	170	91.9	2.4		6.93548
	Zircon-34	919	453	0.492927	0.0483	0.0033	0.0726	0.0041	0.01109	0.00029	0.0034	0.00032	0.39351		71.1	1.9	71.1	3.9	100	140	71.1	1.9		2.0287
	Zircon-35	344	233	0.677326	0.0503	0.0036	0.179	0.011	0.02603	0.00063	0.00831	0.00076	0.039558		165.6	4	167.2	9.1	180	150	165.6	4		1.47639
	Zircon-36	544	357	0.65625	0.0827	0.0084	0.185	0.02	0.01671	0.00042	0.0071	0.0011	0.37517		106.8	2.6	171	16	1190	160	106.8	2.6		1.52381
	Zircon-37	123	75	0.609756	0.0574	0.0089	0.08	0.012	0.01089	0.00051	0.00425	0.00063	0.02897		69.8	3.3	78	11	350	280	69.8	3.3		1.64
	Zircon-38	359	233	0.649025	0.0538	0.0075	0.0256	0.0033	0.00357	0.00016	0.00125	0.00016	-0.073911		23	1	26.3	3.2	320	260	23	1		1.54077
	Zircon-39	222	168	0.756757	0.062	0.011	0.0297	0.0063	0.00346	0.00017	0.00128	0.00025	0.11374		22.2	1.1	29.5	6.2	580	340	22.2	1.1		1.32143
	Zircon-40	435	313	0.71954	0.0578	0.0086	0.0287	0.0039	0.00353	0.00013	0.00122	0.00016	0.25319		22.71	0.86	28.7	3.8	470	250	22.71	0.86		1.38978
	Zircon-41	349	234	0.670487	0.143	0.012	0.0879	0.0078	0.00433	0.00017	0.00294	0.00032	0.34037		27.9	1.1	85.3	7.3	2280	160	27.9	1.1		1.49145
	Zircon-42	327	217	0.663609	0.0529	0.007	0.0275	0.0034	0.00384	0.00017	0.00134	0.00017	0.094084		24.7	1.1	27.4	3.4	190	260	24.7	1.1		1.50691
	Zircon-43	262	151	0.576336	0.0483	0.0043	0.156	0.012	0.02314	0.00061	0.0074	0.00073	0.06091		147.5	3.8	147	11	110	170	147.5	3.8		1.7351
	Zircon-44	329	244	0.741641	0.057	0.01	0.027	0.0045	0.00372	0.00018	0.00139	0.00019	-0.0030453		23.9	1.1	27	4.4	280	280	23.9	1.1		1.34836
	Zircon-45	217	106	0.488479	0.077	0.011	0.0414	0.0056	0.00389	0.00017	0.00199	0.00027	0.096039		25	1.1	41	5.5	1100	240	25	1.1		2.04717
	Zircon-46	428	210	0.490654	0.0508	0.0035	0.0908	0.0053	0.01308	0.00035	0.00459	0.0004	0.28991		83.8	2.2	88.2	4.9	200	150	83.8	2.2		2.0381
	Zircon-47	946	1078	1.13953	0.0567	0.0044	0.087	0.0063	0.01104	0.00026	0.00344	0.00035	0.16695		70.8	1.7	84.6	5.9	480	160	70.8	1.7		0.877551
	Zircon-48	655	429	0.654962	0.0571	0.0095	0.0307	0.0045	0.00377	0.00015	0.00139	0.00018	0.24534		24.23	0.94	30.7	4.4	440	260	24.23	0.94		1.52681
	Zircon-49	425	176	0.414118	0.0487	0.0035	0.1141	0.0074	0.01682	0.0004	0.00492	0.0005	0.10116		107.5	2.5	109.5	6.8	140	160	107.5	2.5		2.41477
	Zircon-50	750	628	0.837333	0.0506	0.004	0.0886	0.0064	0.01271	0.00029	0.00412	0.00038	-0.29182		81.4	1.8	86.2	6	200	160	81.4	1.8		1.19427
	Zircon-51	460	364	0.791304	0.0533	0.0085	0.0256	0.0042	0.00348	0.00013	0.00109	0.00015	0.29449		22.42	0.82	25.6	4.2	410	280	22.42	0.82		1.26374
	Zircon-52	310	163	0.525806	0.0484	0.005	0.0801	0.0072	0.01199	0.00036	0.00413	0.00042	-0.11138		76.8	2.3	78	6.8	70	200	76.8	2.3		1.90184
	Zircon-53	148	96	0.648649	0.0725	0.0057	0.173	0.013	0.01748	0.00057	0.00777	0.0008	0.43033		111.7	3.6	162	11	1030	170	111.7	3.6		1.54167
	Zircon-54	386	260	0.673575	0.0517	0.005	0.0838	0.0075	0.01179	0.00038	0.0041	0.00042	0.01403		75.5	2.4	81.6	6.9	290	180	75.5	2.4		1.48462
	Zircon-55	228	120	0.526316	0.071	0.012	0.0375	0.0057	0.00396	0.0002	0.00142	0.00026	-0.068715		25.5	1.3	37.2	5.5	840	260	25.5	1.3		1.9
	Zircon-56	2595	878	0.338343	0.0476	0.0028	0.0566	0.0028	0.00872	0.00019	0.00438	0.00039	0.056226		55.9	1.2	55.9	2.7	80	130	55.9	1.2		2.95558
	Zircon-57	204	82	0.401961	0.0554	0.0057	0.12	0.012	0.01582	0.00042	0.00505	0.00059	0.1204		101.2	2.7	114	11	390	210	101.2	2.7		2.4878
	Zircon-58	195	97	0.497436	0.05	0.0043	0.101	0.0072	0.01487	0.00044	0.0045	0.00048	-0.090133		95.1	2.8	97.5	6.6	150	180	95.1	2.8		2.01031
	Zircon-59	426	233	0.546948	0.0474	0.0065	0.0243	0.0031	0.00368	0.00014	0.00131	0.00016	0.12043		23.68	0.91	24.4	3.1	60	260	23.68	0.91		1.82833
	Zircon-60	343	64	0.186589	0.0479	0.0035	0.0987	0.0063	0.01494	0.00042	0.00495	0.00063	0.03605		95.6	2.7	95.5	5.8	80	160	95.6	2.7		5.35938
	Zircon-61	242	164	0.677686	0.091	0.013	0.0506	0.0067	0.00411	0.00018	0.00195	0.00025	0.23989		26.4	1.2	49.9	6.5	1340	290	26.4	1.2		1.47561
	Zircon-62	404	233	0.576733	0.0538	0.0044	0.1049	0.0079	0.01442	0.00034	0.0049	0.0005	0.30008		92.3	2.2	101.1	7.2	330	170	92.3	2.2		1.73391
	Zircon-63	274	145	0.529197	0.0473	0.004	0.0987	0.0076	0.01513	0.00043	0.00448	0.00044	0.083533		96.8	2.7	95.3	7	70	170	96.8	2.7		1.88966
	Zircon-64	288	138	0.479167	0.0573	0.0073	0.0279	0.0037	0.00363	0.00018	0.00139	0.0002	-0.041555		23.3	1.2	27.9	3.6	340	260	23.3	1.2		2.08696
	Zircon-65	139	46	0.330935	0.0522	0.0062	0.115	0.013	0.01504	0.00068	0.00565	0.0007	-0.047971		96.2	4.3	110	12	290	240	96.2	4.3		3.02174
	Zircon-66	437	344	0.787185	0.0478	0.0033	0.0954	0.0056	0.0144	0.0004	0.00452	0.00042	0.031756		92.2	2.6	92.5	5.2	100	150	92.2	2.6		1.27035
	Zircon-67	502	241	0.48008	0.0488	0.0038	0.085	0.0059	0.01271	0.00031	0.00428	0.00043	0.11798		81.4	2	82.7	5.5	120	160	81.4	2		2.08299
	Zircon-68	289	129	0.446367	0.05	0.0057	0.0956	0.0095	0.01378	0.0004	0.00462	0.00047	-0.43683		88.2	2.5	92.3	8.7	150	230	88.2	2.5		2.24031
	Zircon-69	247	206	0.834008	0.0597	0.0052	0.092	0.0068	0.01105	0.00032	0.0039	0.00042	0.0294		71.1	2	90.4	6.3	550	180	71.1	2		1.19903
	Zircon-70	830	563	0.678313	0.0476	0.0032	0.0768	0.0044	0.01151	0.00027	0.0035	0.00035	0.43406		73.8	1.7	75.1	4.2	70	150	73.8	1.7		1.47425
